# Supplementary material for: Exome sequencing identifies somatic mutations in novel driver genes in non-small cell lung cancer
Source: Aging (Albany NY). 2020 Jul 6;12(13):13701–15. doi: 10.18632/aging.103500 (PMC7377869; doi:10.18632/aging.103500)
Supplement: Supplementary Table 2 [file aging-12-103500-s001..xls]

## Sheet: supplement table1
Supplementary Table 2. Comparison of mutation rates in 152 genes between NSCLC and normal controls.
Chr	Gene	13 NSCLC patients			COSMIC (v68)			87 normal controls		COSMIC vs. Controls (Fisher-test)
		Patients with mutation	Total number		Patients with mutation	Total number in COSMIC		Subjects with mutation	Total number
8	CSMD3	5	13		320	856		3	87	3.72973e-13
17	TP53	13	13		1690	6577		0	87	7.32445e-12
12	KRAS	1	13		3676	22835		0	87	2.41034e-07
1	RYR2	6	13		284	841		8	87	2.79854e-07
19	ZNF536	2	13		158	848		1	87	7.9122e-07
11	MUC5AC	1	13		108	841		0	87	1.19683e-05
5	HCN1	1	13		132	846		1	87	1.30115e-05
5	CDH10	1	13		129	846		1	87	1.79017e-05
1	TNR	2	13		146	854		2	87	2.80859e-05
1	SPTA1	5	13		209	845		6	87	3.07487e-05
8	FAM135B	1	13		142	847		2	87	3.74752e-05
7	ZNF804B	2	13		97	844		0	87	4.22169e-05
14	LRFN5	2	13		97	844		0	87	4.22169e-05
19	KEAP1	1	13		114	1025		0	87	5.45246e-05
23	ODZ1	1	13		92	851		0	87	7.9075e-05
5	ADAMTS16	2	13		92	852		0	87	7.99619e-05
5	HEATR7B2	1	13		86	841		0	87	0.00013616
14	KIAA1409	1	13		86	842		0	87	0.00013761
13	NALCN	1	13		104	844		1	87	0.000232445
3	SI	2	13		140	845		3	87	0.000242849
9	TLR4	2	13		94	1026		0	87	0.00033392
20	ZNF831	2	13		99	844		1	87	0.000384427
2	LRP1B	2	13		300	1037		11	87	0.000424534
13	KLHL1	1	13		74	842		0	87	0.000503204
5	CDH18	2	13		96	845		1	87	0.000524145
5	ODZ2	1	13		73	841		0	87	0.000555197
1	FAM5C	1	13		128	853		3	87	0.000804831
2	THSD7B	3	13		68	841		0	87	0.000947573
8	ZFPM2	1	13		66	841		0	87	0.00117241
5	ADCY2	2	13		87	841		1	87	0.00122091
2	ZNF804A	1	13		122	846		3	87	0.00125038
12	CACNA1C	1	13		65	841		0	87	0.00130386
3	PDZRN3	1	13		62	851		0	87	0.00192846
11	OR4C6	1	13		61	843		0	87	0.00202109
5	CTNND2	1	13		100	851		2	87	0.00215744
12	NAV3	2	13		146	852		5	87	0.0022468
1	CACNA1E	1	13		114	841		3	87	0.00235957
11	ODZ4	1	13		59	841		0	87	0.00246006
1	OR2M2	1	13		59	846		0	87	0.00254767
4	LPHN3	1	13		115	1025		2	87	0.00305055
14	MDGA2	3	13		57	843		0	87	0.00307811
2	KCNJ3	1	13		56	841		0	87	0.00337327
17	MYH1	1	13		110	844		3	87	0.00342384
11	GRM5	1	13		64	976		0	87	0.00354842
8	UNC5D	2	13		76	844		1	87	0.00361128
5	ADAMTS12	1	13		139	853		5	87	0.00392112
17	MYH4	1	13		92	843		2	87	0.00405971
17	MYH2	1	13		122	844		4	87	0.00435571
8	RIMS2	2	13		92	852		2	87	0.00440739
4	GABRG1	2	13		53	842		0	87	0.00464928
11	OR8J3	1	13		52	842		0	87	0.00516129
1	OR2G6	1	13		52	842		0	87	0.00516129
23	KIAA2022	1	13		52	851		0	87	0.0054513
11	LRRC4C	1	13		71	843		1	87	0.00573149
2	SPHKAP	2	13		105	855		3	87	0.00577712
21	NCAM2	1	13		51	844		0	87	0.00579811
9	CDKN2A	2	13		199	3456		0	87	0.00613932
11	OR4C15	1	13		50	842		0	87	0.00635828
20	PREX1	2	13		70	850		1	87	0.00662311
23	NLGN4X	1	13		70	850		1	87	0.00662311
16	SALL1	2	13		86	842		2	87	0.00678542
12	TRHDE	1	13		49	841		0	87	0.00701525
20	C20orf26	2	13		49	843		0	87	0.00709658
1	OR11L1	1	13		49	846		0	87	0.00721962
7	POM121L12	2	13		68	842		1	87	0.00751979
11	OR5D18	1	13		48	841		0	87	0.00778489
22	SEZ6L	1	13		48	842		0	87	0.00782897
8	COL22A1	2	13		100	846		3	87	0.00794451
7	CNTNAP2	1	13		113	841		4	87	0.00852802
7	C7orf58	2	13		47	841		0	87	0.0086379
3	MORC1	1	13		47	844		0	87	0.00878183
5	CDH12	2	13		97	842		3	87	0.00974213
19	RYR1	2	13		138	844		6	87	0.0103125
7	RELN	2	13		124	841		5	87	0.010497
7	DOCK4	1	13		45	841		0	87	0.0106306
2	REG1B	1	13		45	841		0	87	0.0106306
11	OR10AG1	1	13		45	841		0	87	0.0106306
11	OR4C16	1	13		45	842		0	87	0.0106868
7	PDE1C	1	13		45	842		0	87	0.0106868
7	KCND2	1	13		45	843		0	87	0.0107432
1	LRRC7	2	13		110	844		4	87	0.0110278
11	OR5J2	1	13		44	841		0	87	0.011791
7	PCLO	1	13		161	841		8	87	0.0118089
4	NDST4	1	13		63	842		1	87	0.0119038
11	OR4A16	1	13		44	843		0	87	0.011913
3	SLITRK3	1	13		94	842		3	87	0.0123537
2	CPS1	2	13		94	843		3	87	0.0124588
15	MKRN3	2	13		50	975		0	87	0.0125256
11	OR56A3	1	13		43	841		0	87	0.0130765
6	C6orf138	1	13		43	841		0	87	0.0130765
11	OR5D14	1	13		43	841		0	87	0.0130765
11	ABCC8	2	13		43	842		0	87	0.0131424
10	FRMPD2	1	13		43	842		0	87	0.0131424
17	NF1	1	13		100	1387		1	87	0.0134014
8	ZFHX4	5	13		241	841		15	87	0.0135016
9	TRPM6	1	13		64	876		1	87	0.0135031
10	ITGA8	1	13		78	850		2	87	0.0141797
8	PXDNL	2	13		42	841		0	87	0.0145004
1	OR14A16	1	13		42	841		0	87	0.0145004
13	TRPC4	1	13		42	842		0	87	0.0145716
11	OR5I1	1	13		42	843		0	87	0.0146431
2	LCT	1	13		76	842		2	87	0.0157814
11	C11orf41	2	13		41	841		0	87	0.0160773
15	GABRA5	1	13		41	841		0	87	0.0160773
1	PAPPA2	1	13		157	846		8	87	0.0162301
10	PTEN	2	13		52	1037		0	87	0.0167463
13	DACH1	2	13		40	841		0	87	0.0178235
19	GRLF1	1	13		40	841		0	87	0.0178235
6	COL19A1	1	13		74	841		2	87	0.0184722
10	SORCS3	1	13		74	843		2	87	0.0187302
8	MMP16	2	13		58	850		1	87	0.0195947
8	SLC26A7	1	13		38	841		0	87	0.0218975
1	OR2AK2	1	13		38	842		0	87	0.0219944
12	TMEM132D	1	13		87	847		3	87	0.0220217
8	CNGB3	1	13		56	841		1	87	0.0222203
1	SGIP1	1	13		56	843		1	87	0.0224737
20	PCK1	1	13		38	850		0	87	0.0227771
7	THSD7A	1	13		71	841		2	87	0.0235767
5	SLC45A2	1	13		37	842		0	87	0.0243715
1	ELTD1	2	13		55	843		1	87	0.0245534
12	ADAMTS20	3	13		71	849		2	87	0.0248364
11	DSCAML1	1	13		70	845		2	87	0.026218
7	HECW1	1	13		81	983		2	87	0.0262805
7	CALCR	1	13		42	984		0	87	0.0264794
14	MYH7	2	13		84	842		3	87	0.0265717
8	SNTG1	1	13		54	842		1	87	0.026671
2	SATB2	1	13		54	843		1	87	0.0268159
12	C12orf63	1	13		36	841		0	87	0.0268896
14	FLRT2	1	13		35	841		0	87	0.0297921
18	ZNF521	2	13		83	854		3	87	0.0311119
2	CTNNA2	1	13		68	850		2	87	0.031681
3	ZIC1	1	13		52	842		1	87	0.0317858
2	COL3A1	2	13		81	841		3	87	0.0329358
1	OR2T11	1	13		34	841		0	87	0.0330039
21	ADAMTS5	2	13		52	850		1	87	0.0331177
1	OR2B11	1	13		34	842		0	87	0.033134
11	OR4P4	1	13		34	843		0	87	0.0332642
23	PASD1	1	13		34	849		0	87	0.0340503
7	ABCB1	1	13		66	842		2	87	0.0353239
5	FBXL7	1	13		51	849		1	87	0.0359202
20	CHRNA4	3	13		33	841		0	87	0.0365576
13	GPC5	1	13		33	842		0	87	0.0366972
5	FAM71B	1	13		50	841		1	87	0.0376375
23	F9	1	13		33	849		0	87	0.0376806
10	APBB1IP	1	13		33	850		0	87	0.0378219
4	GABRA2	1	13		50	842		1	87	0.0378242
3	CASR	1	13		50	842		1	87	0.0378242
11	OR5T1	1	13		32	841		0	87	0.040489
7	MUC3A	1	13		32	841		0	87	0.040489
11	OR8K1	1	13		32	842		0	87	0.0406388
18	SLC14A2	1	13		32	842		0	87	0.0406388
14	NOVA1	1	13		32	849		0	87	0.0416931
