# Supplementary material for: Exome sequencing identifies somatic mutations in novel driver genes in non-small cell lung cancer
Source: Aging (Albany NY). 2020 Jul 6;12(13):13701–15. doi: 10.18632/aging.103500 (PMC7377869; doi:10.18632/aging.103500)
Supplement: Supplementary Table 3 [file aging-12-103500-s005..xls]

## Sheet: supplement table2
Supplementary Table 3. Average coverage of sequencing in 88 paired-samples.
Sample		Depth	ARID1A	ARID2	BRAF	DACH1	EGFR	ERBB2	ERBB4	NFE2L2	NOTCH1	PIK3CA	RB1	RIT1	SMARCA4	STK11	TP53	CDH10	CDKN2A	CTNND2	GPC5	HECW1	KEAP1	KRAS	NF1	PREX1	PTEN	RELN	UNC5D
mean_value		999.903	0.89842	0.910929	0.777316	0.732311	0.962118	0.980113	0.930361	0.858058	0.9694	0.715852	0.686546	0.991081	0.940664	0.909591	0.977109	0.932679	0.992678	0.897353	0.910651	0.971944	0.99843	0.885848	0.881336	0.943181	0.921043	0.930784	0.976031
LT00012	control	1113.49	0.9074	0.9302	0.7784	0.8527	0.9699	0.9929	0.9138	0.8919	0.9729	0.7428	0.7345	0.9925	0.9426	0.9047	0.9906	0.6591	1	0.7934	0.5945	0.8631	0.9648	0.1747	0.5129	0.5811	0.4612	0.6824	0.7662
LT00012	first	1077.58	0.8585	0.8806	0.796	0.7095	0.9699	0.9929	0.9138	0.7543	0.9499	0.6886	0.5832	0.9925	0.9426	0.894	0.9067	0.9421	1	0.8861	1	0.9772	1	1	0.886	0.956	0.9538	0.9239	1
LT00012	repeat	639.205	0.8825	0.9302	0.7128	0.5589	0.9699	0.946	0.8789	0.8919	0.9561	0.6886	0.7452	0.9925	0.903	0.926	0.9906	0.9421	1	0.8861	1	0.9772	1	1	0.9025	0.956	0.9538	0.9394	1
LT00013	control	1388.86	0.8835	0.9302	0.7443	0.7413	0.9699	0.9929	0.9482	0.8919	0.9729	0.7682	0.7122	0.9925	0.9426	0.9687	0.9906	0.9421	1	0.8861	1	0.9772	1	0.7671	0.886	0.956	0.8837	0.9276	0.9423
LT00013	first	1040.51	0.8585	0.8806	0.796	0.7095	0.9699	0.9929	0.9312	0.7543	0.9499	0.7428	0.6606	0.9925	0.9426	0.8604	0.9067	0.9421	1	0.8864	1	0.9772	1	1	0.8871	0.956	0.9538	0.9524	1
LT00013	repeat	867.181	0.9011	0.9302	0.853	0.5589	0.9699	0.946	0.9497	0.8919	0.9561	0.7636	0.6756	0.9925	0.903	0.8932	0.9906	0.9421	1	0.8861	0.9069	0.9772	1	0.7394	0.9025	0.956	0.9538	0.9314	1
LT00014	control	1258.19	0.9011	0.9302	0.7727	0.8148	0.9699	0.9929	0.958	0.8919	0.9729	0.6886	0.7434	0.9925	0.9426	0.894	0.9906	0.9421	1	0.8861	0.9267	0.9772	1	0.7671	0.8562	0.956	0.8837	0.907	1
LT00014	first	924.754	0.8312	0.847	0.7266	0.7095	0.9699	0.9929	0.8695	0.7543	0.9499	0.6167	0.5807	0.9925	0.9426	0.8604	0.9067	0.9421	1	0.8861	1	0.9772	1	1	0.9025	0.956	0.9538	0.9375	1
LT00014	repeat	936.669	0.8927	0.9302	0.9168	0.5884	0.9699	0.946	0.9929	0.8919	0.9561	0.7428	0.7573	0.9925	0.903	0.9245	0.9906	0.9421	1	0.8861	0.9267	0.9772	1	1	0.9025	0.956	0.9538	0.9388	1
LT00015	control	1041.77	0.9011	0.9302	0.8353	0.8167	0.9699	0.9929	0.9745	0.8919	0.9729	0.714	0.8152	0.9925	0.9426	0.9047	0.9906	0.8893	1	0.8861	0.8336	0.9772	1	1	0.8906	0.956	0.9538	0.9375	1
LT00015	first	1128.06	0.8585	0.8698	0.796	0.7413	0.9699	0.9929	0.9312	0.7543	0.9499	0.6817	0.6546	0.9925	0.9426	0.8604	0.9067	0.9421	1	0.8861	1	0.9772	1	1	0.9095	0.956	0.9538	0.9627	1
LT00015	repeat	1037.28	0.9011	0.9302	0.7814	0.5889	0.9699	0.946	0.9929	0.8919	0.9561	0.7428	0.7452	0.9925	0.903	0.9047	0.9906	0.9421	1	0.8861	0.9267	0.9772	1	1	0.9025	0.956	0.9538	0.9464	1
LT00016	control	897.378	0.8835	0.9606	0.7456	0.8527	0.9699	0.9929	0.8802	0.8919	0.9729	0.7806	0.7011	0.9925	0.9426	0.8604	0.9906	0.9421	1	0.8861	0.9069	0.9772	0.9648	1	0.9173	0.956	0.9538	0.9375	1
LT00016	first	1090.57	0.8585	0.8806	0.796	0.7095	0.9699	0.9929	0.8958	0.7543	0.9499	0.6839	0.6766	0.9925	0.9426	0.8604	0.9067	0.9421	1	0.8861	1	0.9772	0.9653	1	0.8871	0.956	0.9538	0.9276	1
LT00016	repeat	996.321	0.9055	0.8965	0.7814	0.5884	0.9699	0.946	0.9497	0.8919	0.9561	0.6886	0.752	0.9925	0.903	0.9245	0.9906	0.9421	1	0.8861	0.8365	0.9772	1	1	0.9055	0.956	0.9538	0.9375	1
LT00017	control	935.52	0.9215	0.9302	0.8245	0.8087	0.9699	0.9929	0.9497	0.8919	0.9729	0.7428	0.7235	0.9925	0.9426	0.9047	0.9906	0.9421	1	0.9152	0.6853	0.9772	1	0.5066	0.8448	0.9271	0.7665	0.9239	0.8899
LT00017	first	1089.8	0.8171	0.8806	0.8245	0.7095	0.9699	0.9929	0.9666	0.7543	0.9499	0.7378	0.6397	0.9925	0.9426	0.8604	0.9067	0.9421	1	0.938	0.9267	0.9772	1	1	0.8941	0.956	0.9538	0.9375	1
LT00017	repeat	950.287	0.9215	0.9302	0.8603	0.5589	0.9699	0.946	0.9666	0.8919	0.9709	0.6886	0.7232	0.9925	0.903	0.8604	0.9906	0.9421	1	0.8861	0.9267	0.9772	1	0.7671	0.9025	0.9271	0.9538	0.9239	1
LT00018	control	1077.82	0.894	0.9302	0.7814	0.7095	0.9699	0.9929	0.8958	0.8919	0.9729	0.6839	0.6087	0.9925	0.9426	0.8604	0.9906	0.9421	1	0.882	0.829	0.9772	1	0.5066	0.8443	0.956	0.9538	0.9359	1
LT00018	first	1056.82	0.8312	0.8598	0.7206	0.6885	0.9699	0.9929	0.8432	0.7543	0.9499	0.6244	0.5622	0.9925	0.9426	0.894	0.9067	0.9421	1	0.8861	0.9069	0.9772	1	1	0.8726	0.956	0.9538	0.968	1
LT00018	repeat	812.767	0.9011	0.9302	0.7814	0.6399	0.9699	0.946	0.9545	0.8919	0.9561	0.6886	0.7178	0.9925	0.903	0.8604	0.9906	0.9421	1	0.8861	0.8487	0.9772	1	0.7671	0.9074	0.956	0.9538	0.9375	1
LT00019	control	1171.62	0.9247	0.9094	0.796	0.7853	0.9699	0.9929	0.9138	0.8919	0.9729	0.6864	0.7018	0.9925	0.9583	0.9626	0.9906	0.8711	1	0.9057	0.7557	0.9772	1	0.5066	0.8562	0.956	0.8837	0.8838	0.9476
LT00019	first	980.369	0.8312	0.8598	0.7029	0.6885	0.9699	0.9929	0.8432	0.7543	0.9538	0.6092	0.538	0.9925	0.9583	0.8604	0.9067	0.9421	1	0.8861	0.9267	0.9772	1	0.7671	0.888	0.956	0.9538	0.9375	1
LT00019	repeat	846.486	0.9074	0.9302	0.796	0.5589	0.9699	0.946	0.957	0.8919	0.9561	0.7416	0.6883	0.9925	0.903	0.9291	0.9906	0.9421	1	0.8861	0.9267	0.9772	1	1	0.9025	0.956	0.9538	0.9375	0.9476
LT00020	control	1088.68	0.9209	0.9094	0.8012	0.8162	0.9699	0.9929	0.957	0.8919	0.9729	0.714	0.6134	0.9925	0.9426	0.8604	0.9906	0.9421	1	0.938	0.8336	0.9772	1	0.7671	0.9092	0.956	0.9538	0.9258	1
LT00020	first	881.405	0.885	0.8806	0.796	0.7413	0.9699	0.9929	0.9138	0.7543	0.9538	0.714	0.6546	0.9925	0.9583	0.894	0.9067	0.9421	1	0.8861	0.8336	0.9772	1	1	0.8906	0.956	0.9538	0.9375	1
LT00020	repeat	807.141	0.8825	0.9302	0.7223	0.5589	0.9699	0.946	0.9138	0.8919	0.9561	0.714	0.6979	0.9925	0.903	0.894	0.9906	0.9421	1	0.8861	0.8336	0.9772	1	1	0.9025	0.956	0.9538	0.8846	1
LT00021	control	820.879	0.9011	0.9302	0.7818	0.7708	0.9699	0.9929	0.9138	0.8919	0.9729	0.714	0.7274	0.9925	0.9426	0.9931	0.9906	0.9421	1	0.8861	0.8336	0.9772	1	0.7671	0.8706	0.956	0.9538	0.9223	1
LT00021	first	887.231	0.8585	0.8598	0.7443	0.7095	0.9699	0.9929	0.8632	0.7543	0.9499	0.6737	0.5689	0.9925	0.9426	0.8604	0.9067	0.9421	1	0.8864	0.9267	0.9772	1	1	0.9025	0.956	0.9538	0.9375	1
LT00021	repeat	886.454	0.8965	0.9302	0.796	0.5884	0.9699	0.946	0.9666	0.8919	0.9561	0.8048	0.7143	0.9925	0.903	0.894	0.9906	0.9421	1	0.8861	0.9267	0.9772	1	1	0.9025	0.9271	0.9538	0.9524	1
LT00022	control	845.687	0.8738	0.8734	0.7654	0.6885	0.9699	0.9929	0.8589	0.8919	0.9729	0.6886	0.6141	0.9925	0.9675	0.9245	0.9906	0.9421	1	0.8918	0.829	0.9772	1	0.5066	0.8562	0.956	0.8837	0.9209	0.9476
LT00022	first	964.863	0.8312	0.847	0.6762	0.6403	0.9699	0.9929	0.8432	0.7543	0.9499	0.5773	0.538	0.9925	0.9426	0.8604	0.9067	0.9421	1	0.8861	1	0.9772	1	1	0.888	0.956	0.9538	0.9524	0.964
LT00022	repeat	905.219	0.9011	0.9302	0.796	0.5884	0.9699	0.946	0.9138	0.8919	0.9561	0.7264	0.7374	0.9925	0.903	0.9047	0.9906	0.9421	1	0.8861	0.9069	0.9772	1	1	0.8906	0.956	0.8837	0.9239	1
LT00024	control	863.727	0.8942	0.907	0.796	0.7413	0.9699	0.9929	0.9133	0.8919	0.9729	0.6886	0.6649	0.9925	0.9426	0.9291	0.9906	0.8711	1	0.8967	0.6853	0.9772	0.9648	0.1747	0.8259	0.956	0.6287	0.9073	0.8899
LT00024	first	1198.06	0.7898	0.8806	0.796	0.7853	0.9699	0.9929	0.9138	0.7543	0.9499	0.6886	0.6397	0.9925	0.9426	0.8604	0.9067	0.9421	1	0.938	0.9267	0.9772	1	0.7671	0.886	0.956	0.9538	0.9375	1
LT00024	repeat	971.993	0.9036	0.9302	0.796	0.6071	0.9699	0.946	0.9312	0.8919	0.9709	0.714	0.7146	0.9925	0.903	0.9291	0.9906	0.9421	1	0.9152	0.8336	0.9772	1	0.7394	0.8871	0.956	0.9538	0.9073	1
LT00025	control	1029.3	0.9211	0.9072	0.796	0.7413	0.9699	0.9929	0.9307	0.8919	0.9729	0.6886	0.6141	0.9925	0.9426	0.8604	0.9906	0.9421	1	0.938	0.9069	0.9772	0.9653	1	0.8941	0.956	0.9538	0.9395	1
LT00025	first	1096.08	0.8585	0.8806	0.796	0.7095	0.9699	0.9929	0.9138	0.7543	0.9499	0.7078	0.6233	0.9925	0.9583	0.894	0.9067	0.9421	1	0.9377	1	0.9772	1	1	0.9025	0.956	0.9538	0.9524	1
LT00025	repeat	927.307	0.9362	0.9302	0.853	0.5589	0.9699	0.946	0.957	0.8919	0.9561	0.7428	0.7655	0.9925	0.903	0.8604	0.9906	0.9421	1	0.8861	1	0.9772	0.9653	1	0.9025	0.956	0.9538	0.9239	1
LT00027	control	1029.51	0.9215	0.9302	0.7814	0.7095	0.9699	0.9929	0.9138	0.8919	0.9729	0.7682	0.6756	0.9925	0.9426	0.9931	0.9906	0.9421	1	0.8861	0.8336	0.9772	1	0.5066	0.9025	0.956	0.9538	0.8929	1
LT00027	first	968.064	0.8587	0.8806	0.7443	0.7095	0.9699	0.9929	0.8789	0.7543	0.9538	0.6886	0.6674	0.9925	0.9426	0.8604	0.9067	0.9421	1	0.938	0.9267	0.9772	1	1	0.8871	0.956	0.8837	0.9375	1
LT00027	repeat	983.29	0.9074	0.9302	0.796	0.5589	0.9699	0.946	0.9929	0.8919	0.9561	0.7428	0.7146	0.9925	0.903	0.9886	0.9906	0.9421	1	0.9331	0.9267	0.9772	1	1	0.918	0.956	0.8837	0.9375	1
LT00028	control	895.642	0.8805	0.9302	0.7646	0.7095	0.9699	0.9929	0.8789	0.8919	0.9877	0.6886	0.6702	0.9925	0.9426	0.9291	0.9906	0.9421	1	0.956	0.8336	0.9772	1	0.5066	0.8443	0.956	0.8837	0.9209	1
LT00028	first	883.163	0.8409	0.8598	0.693	0.7095	0.9699	0.9929	0.826	0.7543	0.9499	0.6148	0.5686	0.9925	0.9426	0.8604	0.9067	0.9421	1	0.9481	0.9267	0.9772	1	0.7671	0.8562	0.956	0.9538	0.9375	1
LT00028	repeat	908.498	0.9104	0.9658	0.796	0.5589	0.9699	0.946	0.9482	0.8919	0.9748	0.714	0.7438	0.9925	0.903	0.9382	0.9906	0.9421	1	0.8861	1	0.9772	1	1	0.9025	0.956	0.9538	0.9375	1
LT00029	control	565.937	0.9074	0.9302	0.7814	0.739	0.9699	0.9747	0.9307	0.8919	0.9729	0.6886	0.6752	0.9925	0.9426	0.8604	0.9906	0.9421	1	0.8861	0.7632	0.9772	1	0.5066	0.8548	0.956	0.8837	0.9359	0.9476
LT00029	first	788.544	0.8142	0.8338	0.6606	0.6609	0.9699	0.9747	0.7947	0.7005	0.9499	0.5572	0.5373	0.9925	0.9426	0.8604	0.9067	0.9421	1	0.938	0.9267	0.9772	1	0.5066	0.8562	0.956	0.9538	0.9209	1
LT00029	repeat	871.93	0.9084	0.9302	0.796	0.5589	0.9699	0.946	0.9307	0.8919	0.9561	0.7958	0.7704	0.9925	0.903	0.8604	0.9906	0.9421	1	0.8861	0.8336	0.9772	1	0.5066	0.8871	0.956	0.9538	0.9524	1
LT00030	control	807.836	0.8738	0.9302	0.7296	0.6403	0.9699	0.9929	0.8632	0.8919	0.9729	0.6839	0.6702	0.9925	0.9426	0.9047	0.9906	0.9421	1	0.8861	0.7504	0.9772	1	0.7394	0.887	0.956	0.9538	0.9201	1
LT00030	first	813.918	0.7995	0.8806	0.8335	0.8148	0.9699	0.9929	0.9929	0.7543	0.9472	0.8045	0.7559	0.9925	0.9426	0.8604	0.9067	0.9421	1	0.8766	0.9215	0.9772	1	0.9971	0.8606	0.956	0.8837	0.9209	1
LT00030	repeat	889.053	0.9036	0.9606	0.8603	0.5884	0.9699	0.946	0.957	0.8919	0.9561	0.7428	0.7146	0.9925	0.903	0.9634	0.9906	0.9421	1	0.8861	0.9215	0.9772	1	0.5066	0.8706	0.956	0.9538	0.9324	1
LT00031	control	1037.57	0.9011	0.9302	0.7814	0.7095	0.9699	0.9929	0.9307	0.8919	0.9877	0.6886	0.7505	0.9925	0.9426	0.9931	0.9906	0.9421	1	0.9386	0.9069	0.9772	1	0.5066	0.8666	0.956	0.8837	0.9239	1
LT00031	first	836.719	0.8585	0.8806	0.796	0.7095	0.9699	0.9929	0.9138	0.7543	0.9499	0.6886	0.6183	0.9925	0.9426	0.8604	0.9067	0.9421	1	0.8861	1	0.9772	1	0.7394	0.883	0.956	0.9538	0.9388	1
LT00031	repeat	976.432	0.9011	0.9606	0.8245	0.5884	0.9699	0.946	0.9929	0.8919	0.9561	0.714	0.7377	0.9925	0.903	0.9291	0.9906	0.9421	1	0.8861	1	0.9772	1	1	0.883	0.956	0.9538	0.9239	1
LT00032	control	1006.42	0.9011	0.8965	0.7641	0.6885	0.9699	0.9929	0.9307	0.8919	0.9729	0.7143	0.6727	0.9925	0.9583	0.9291	0.9906	0.8711	1	0.8967	0.829	0.9772	0.9691	0.5066	0.8438	0.956	0.8837	0.9314	0.8899
LT00032	first	1098.44	0.8312	0.847	0.693	0.6403	0.9699	0.9929	0.826	0.7543	0.9499	0.6145	0.5622	0.9925	0.9583	0.8604	0.9067	0.9421	1	0.938	0.9069	0.9772	1	1	0.8822	0.956	0.9538	0.9375	1
LT00032	repeat	677.305	0.8505	0.8486	0.6335	0.5257	0.9229	0.946	0.8182	0.8387	0.9561	0.5674	0.543	0.9925	0.9188	0.8604	0.9906	0.9421	1	0.8861	0.9069	0.9772	1	1	0.9025	0.956	0.9538	0.9524	1
LT00033	control	1113.71	0.7953	0.641	0.37	0.4635	0.7637	0.9747	0.5537	0.6753	0.9459	0.1085	0.1254	0.618	0.9664	0.8604	0.978	0.9421	1	0.9057	0.9069	0.9772	1	0.7671	0.8548	0.956	0.8837	0.911	1
LT00033	first	1157.71	0.8343	0.8918	0.796	0.6885	0.9699	0.9747	0.8728	0.7543	0.9499	0.6814	0.5974	0.9925	0.9426	0.8604	0.9067	0.8711	1	0.9386	0.8365	0.9772	1	0.5066	0.8562	0.956	0.8837	0.9209	1
LT00033	repeat	934.064	0.9748	0.9606	0.9172	0.8148	0.9699	0.9929	0.9929	0.8919	0.9768	0.7667	0.8387	0.9925	0.9426	0.9886	0.9906	0.9421	1	0.8766	0.7586	0.9772	1	0.5066	0.8588	0.956	0.8837	0.8931	1
LT00034	control	582.066	0.9215	0.9302	0.796	0.7095	0.9699	0.9747	0.9135	0.8919	0.9729	0.6886	0.705	0.9925	0.9583	0.9291	0.9906	0.9421	1	0.8861	0.9069	0.9772	1	0.7394	0.8706	0.956	0.9538	0.9238	1
LT00034	first	1088.52	0.8771	0.8806	0.7758	0.7095	0.9699	0.9747	0.9312	0.7543	0.9499	0.6886	0.6482	0.9925	0.9426	0.9245	0.9067	0.9421	1	0.938	1	0.9772	1	1	0.9095	0.956	0.9538	0.9375	1
LT00034	repeat	985.097	0.9567	0.9302	0.8603	0.8036	0.9699	0.9929	0.9929	0.8919	0.9768	0.7428	0.7573	0.9925	0.9426	0.9382	0.9906	0.9421	1	0.8861	0.9069	0.9772	1	1	0.9025	0.956	0.9538	0.968	1
LT00035	control	625.287	0.9215	0.9302	0.796	0.7624	0.9699	0.9929	0.9138	0.8919	0.9729	0.7357	0.6756	0.9925	0.9583	0.9626	0.9906	0.9421	1	0.8861	1	0.9772	1	0.7671	0.9025	0.956	0.9538	0.9388	1
LT00035	first	1007.9	0.8409	0.8598	0.7206	0.6908	0.9699	0.9929	0.8789	0.7543	0.9499	0.6489	0.5729	0.9925	0.9426	0.8604	0.9067	0.9421	1	0.938	1	0.9772	1	1	0.895	0.956	0.9538	0.9178	1
LT00035	repeat	935.397	0.9471	0.9302	0.796	0.7095	0.9699	0.9929	0.9138	0.8919	0.9768	0.7264	0.7182	0.9925	0.9426	0.894	0.9906	0.9421	1	0.9152	1	0.9772	1	1	0.9025	0.956	0.9538	0.9375	1
LT00036	control	826.185	0.9074	0.9302	0.796	0.7413	0.9699	0.9747	0.8966	0.8919	0.9729	0.6886	0.7011	0.9925	0.9426	0.9291	0.9906	0.9421	1	0.9152	0.9267	0.9772	1	0.7671	0.886	0.956	0.9538	0.9524	1
LT00036	first	793.226	0.8171	0.8918	0.8775	0.8527	0.9699	0.9929	0.9929	0.7543	0.9499	0.8045	0.774	0.9925	0.9426	0.9291	0.9067	0.9421	1	0.9285	0.9267	0.9772	1	0.5066	0.8632	0.956	0.9538	0.9209	1
LT00036	repeat	818.368	0.9468	0.9302	0.8603	0.7853	0.9699	0.9929	0.9138	0.8919	0.9768	0.714	0.7143	0.9925	0.9426	0.8604	0.9906	0.9421	1	0.9331	0.8336	0.9772	1	1	0.9025	0.956	0.9538	0.9375	1
LT00038	control	854.639	0.8662	0.8492	0.599	0.5884	0.9474	0.9929	0.7707	0.8382	0.9877	0.4983	0.4673	0.9925	0.9675	0.8604	0.9906	0.8002	1	0.9279	0.8319	0.9772	1	0.7394	0.8747	0.956	0.9538	0.906	1
LT00038	first	1316.88	0.8619	0.8806	0.7646	0.7095	0.9699	0.9929	0.9312	0.7543	0.9538	0.6886	0.5959	0.9925	0.9583	0.9047	0.9067	0.8893	0.8761	0.7749	0.6725	0.9129	1	0.1747	0.6692	0.7777	0.264	0.7915	0.7666
LT00038	repeat	1074.81	0.8809	0.8146	0.721	0.6403	0.9699	0.9929	0.8541	0.8919	0.9729	0.6585	0.5146	0.9925	0.9583	0.8604	0.978	0.8711	1	0.9285	0.6853	0.9772	1	0.5066	0.8285	0.956	0.7145	0.9205	0.9476
LT00039	control	874.316	0.9011	0.9302	0.7443	0.724	0.9699	0.9929	0.9666	0.8919	0.9729	0.714	0.7299	0.9925	0.9426	0.9931	0.9906	0.9421	1	0.938	0.8336	0.9772	1	0.7671	0.9025	0.956	0.9538	0.9451	1
LT00039	first	1348.81	0.9116	0.8918	0.8887	0.7853	0.9699	0.9929	0.9666	0.7543	0.9578	0.7806	0.8262	0.9925	0.9426	0.9657	0.9067	0.8897	0.8761	0.8374	0.8365	0.9129	1	0.7671	0.7715	0.7783	0.7137	0.8133	0.7666
LT00039	repeat	1012.74	0.8907	0.9302	0.796	0.7848	0.9699	0.9929	0.8963	0.8919	0.9729	0.6886	0.6756	0.9925	0.9426	0.8604	0.9906	0.9421	1	0.8861	0.9267	0.9772	1	1	0.9259	0.956	0.9538	0.973	1
LT00040	control	785.885	0.9107	0.9302	0.796	0.8087	0.9699	0.9929	0.9307	0.8919	0.9729	0.6886	0.6958	0.9925	0.9426	0.9619	0.9906	0.9421	1	0.938	0.9267	0.9772	1	1	0.9025	0.956	0.9538	0.9524	1
LT00040	first	1124.21	0.8585	0.8598	0.762	0.7413	0.9699	0.9929	0.9138	0.7543	0.9538	0.6886	0.6134	0.9925	0.9426	0.8604	0.9067	0.9421	1	0.938	0.9267	0.9772	1	1	0.9025	0.956	0.9538	0.9531	1
LT00040	repeat	726.866	0.8888	0.9302	0.8603	0.5734	0.9699	0.946	0.9307	0.8919	0.9748	0.7428	0.7456	0.9925	0.903	0.8604	0.9906	0.9421	1	0.8861	0.9267	0.9772	1	1	0.9025	0.956	0.9538	0.9239	1
LT00041	control	748.176	0.9215	0.9302	0.796	0.7853	0.9699	0.9929	0.9138	0.8919	0.9768	0.6886	0.7011	0.9925	0.9675	0.9931	0.9906	0.8002	1	0.9279	0.8319	0.9772	1	1	0.8688	0.956	0.9538	0.9196	1
LT00041	first	1009.81	0.8619	0.8806	0.765	0.7095	0.9699	0.9929	0.8789	0.7543	0.9499	0.6839	0.6084	0.9925	0.9426	0.8604	0.9067	0.9421	1	0.938	0.9267	0.9772	1	1	0.888	0.956	0.9538	0.9375	1
LT00041	repeat	784.314	0.9011	0.9302	0.8538	0.5589	0.9699	0.946	0.9138	0.8919	0.9561	0.7428	0.6738	0.9925	0.903	0.8604	0.9906	0.9421	1	0.8861	0.9267	0.9772	1	1	0.9025	0.956	0.9538	0.9495	1
LT00008	control	1130.85	0.9011	0.8965	0.7499	0.638	0.9699	0.9929	0.9138	0.8919	0.9729	0.5913	0.538	0.9925	0.927	0.894	0.9906	0.9421	1	0.8861	1	0.9772	1	1	0.9095	0.956	0.9538	0.9524	1
LT00008	first	1157.02	0.8492	0.8806	0.8887	0.8522	0.9699	0.9929	0.9929	0.7543	0.9499	0.7416	0.8145	0.9925	0.9426	0.9634	0.9067	0.8897	0.875	0.8374	0.7388	0.9355	1	0.7671	0.7119	0.7777	0.7129	0.798	0.7666
LT00008	repeat	843.905	0.8735	0.8958	0.737	0.7095	0.9699	0.9929	0.8432	0.8919	0.9729	0.6886	0.5832	0.9925	0.9426	0.894	0.9906	0.9421	1	0.8861	1	0.9772	1	1	0.9025	0.956	0.9538	0.9474	0.964
LT00009	control	1005.17	0.8399	0.9302	0.7193	0.7413	0.9699	0.9929	0.9133	0.8919	0.959	0.6839	0.7154	0.9925	0.9294	0.8604	0.9906	0.9421	1	0.8861	0.8336	0.9772	1	1	0.9095	0.956	0.9538	0.9524	1
LT00009	first	1004.43	0.8171	0.8806	0.859	0.8527	0.9699	0.9929	0.9929	0.7543	0.9499	0.8336	0.8141	0.9925	0.9426	0.9626	0.9067	0.8897	0.8761	0.7858	0.7429	0.9127	1	0.7671	0.7274	0.7777	0.7137	0.803	0.7666
LT00009	repeat	935.467	0.8712	0.9302	0.7809	0.7095	0.9699	0.9929	0.9312	0.8919	0.9729	0.7428	0.6343	0.9925	0.9294	0.8604	0.9906	0.9421	1	0.876	0.9267	0.9772	1	1	0.9025	0.956	0.9546	0.9325	0.964
LT00102	control	925.946	0.9245	0.9302	0.8301	0.7708	0.9699	0.9929	0.9497	0.8919	0.9729	0.7428	0.7253	0.9925	0.9583	0.9931	0.9906	0.9421	1	0.8861	1	0.9772	1	1	0.9095	0.956	0.9538	0.9627	1
LT00102	first	1188.85	0.8851	0.8918	0.796	0.7095	0.9699	0.9929	0.9497	0.7543	0.9538	0.6886	0.6429	0.9925	0.9583	0.9047	0.9067	0.9421	1	0.938	1	0.9772	1	1	0.9095	0.956	0.9538	0.9524	1
LT00102	repeat	1203.19	0.949	0.9302	0.8301	0.7853	0.9699	0.9929	0.9497	0.8919	0.9808	0.7667	0.635	0.9925	0.9426	0.9291	0.9906	0.9421	1	0.938	0.9069	0.9772	1	1	0.9095	0.956	0.9538	0.9314	1
LT00104	control	1102.67	0.9084	0.9302	0.796	0.7853	0.9699	0.9929	0.9497	0.8919	0.9729	0.7667	0.7274	0.9925	0.9426	0.9687	0.9906	0.9421	1	0.8861	0.9267	0.9772	1	1	0.9025	0.956	0.9538	0.968	1
LT00104	first	1140.92	0.9468	0.9302	0.8603	0.7853	0.9699	0.9929	0.9497	0.8919	0.9768	0.7518	0.699	0.9925	0.9426	0.9931	0.9906	0.9421	1	0.938	0.8336	0.9772	1	1	0.89	0.956	0.9538	0.9375	1
LT00104	repeat	1032.08	0.9254	0.9302	0.8301	0.7095	0.9699	0.9929	0.9312	0.8919	0.9808	0.6886	0.6748	0.9925	0.9426	0.9291	0.9906	0.9421	1	0.938	0.8336	0.9772	1	1	0.8899	0.956	0.9538	0.9375	1
LT00107	control	1050.18	0.9036	0.9302	0.796	0.7413	0.9699	0.9747	0.9307	0.8919	0.9729	0.7394	0.6745	0.9925	0.9426	0.9375	0.9906	0.9421	1	0.938	0.8336	0.9772	1	0.5066	0.8437	0.956	0.9538	0.9375	1
LT00107	first	1074.26	0.9669	0.9302	0.8603	0.7853	0.9699	0.9929	0.9497	0.8919	0.9808	0.7428	0.7637	0.9925	0.9426	0.9626	0.9906	0.9421	1	0.938	0.9267	0.9772	1	1	0.89	0.956	0.9538	0.9375	1
LT00107	repeat	1052.1	0.9513	0.9302	0.8301	0.7853	0.9699	0.9929	0.9138	0.8919	0.9808	0.714	0.6756	0.9925	0.9426	0.894	0.9906	0.9421	1	0.938	0.9267	0.9772	1	1	0.883	0.956	0.9538	0.9375	1
LT00108	control	919.079	0.9215	0.9302	0.796	0.7095	0.9923	0.9929	0.9307	0.8919	0.9729	0.6886	0.6702	0.9925	0.9426	0.894	0.9906	0.9421	1	0.8861	1	0.9772	1	1	0.9095	0.956	0.9538	0.9425	1
LT00108	first	983.491	0.9074	0.8964	0.6421	0.7413	0.9194	0.9518	0.9138	0.8135	0.9729	0.6839	0.6734	0.9925	0.9426	0.8604	0.9906	0.9421	1	0.938	1	0.9772	1	0.5066	0.8706	0.956	0.9538	0.9239	1
LT00108	repeat	1013.17	0.9215	0.8965	0.8301	0.7853	0.9699	0.9929	0.9307	0.8919	0.9729	0.714	0.6237	0.9925	0.9426	0.8604	0.9906	0.9421	1	0.938	1	0.9772	1	0.7394	0.9093	0.956	0.9538	0.9375	1
LT00109	control	974.968	0.9084	0.9302	0.8301	0.8148	0.9699	0.9929	0.957	0.8919	0.9729	0.8045	0.7246	0.9925	0.9426	0.9687	0.9906	0.9421	1	0.8861	0.8336	0.9772	1	1	0.8941	0.956	0.9538	0.9524	1
LT00109	first	939.235	0.9116	0.8964	0.6705	0.8148	0.9194	0.9518	0.9482	0.8135	0.9729	0.6886	0.7434	0.9925	0.9426	0.9382	0.9906	0.9421	1	0.8929	0.9267	0.9772	1	1	0.886	0.956	0.9538	0.939	1
LT00109	repeat	1014.87	0.9247	0.9302	0.796	0.7418	0.9699	0.9929	0.9312	0.8919	0.9729	0.7394	0.6958	0.9925	0.9426	0.8604	0.9906	0.9421	1	0.938	0.9267	0.9772	1	1	0.9025	0.956	0.9538	0.9286	1
LT00092	control	1067.78	0.9011	0.9302	0.8301	0.7853	0.9699	0.9929	0.9307	0.8919	0.9729	0.7347	0.6485	0.9925	0.9426	0.894	0.9906	0.9421	1	0.8861	0.9267	0.9772	1	1	0.9025	0.956	0.9538	0.9524	1
LT00092	first	944.982	0.8171	0.8806	0.7193	0.739	0.9699	0.9929	0.957	0.7543	0.9499	0.7428	0.7573	0.9925	0.9583	0.9931	0.9067	0.9421	1	0.938	0.9267	0.9772	1	1	0.9025	0.956	0.9538	0.9239	1
LT00092	repeat	974.999	0.9211	0.9302	0.796	0.7095	0.9699	0.9929	0.9138	0.8919	0.9877	0.7106	0.6546	0.9925	0.9426	0.8604	0.9906	0.9421	1	0.938	0.9267	0.9772	1	1	0.9095	0.956	0.9538	0.9239	1
LT00110	control	1093.37	0.9011	0.9302	0.796	0.7708	0.9699	0.9929	0.9666	0.8919	0.9877	0.6886	0.6752	0.9925	0.9426	0.9245	0.9906	0.9421	1	0.8861	0.9069	0.9772	1	1	0.9095	0.956	0.9538	0.9388	1
LT00110	first	1041.12	0.9215	0.8964	0.699	0.8148	0.9194	0.9518	0.9666	0.8135	0.9729	0.7428	0.7136	0.9925	0.9583	0.9245	0.9906	0.9421	1	0.8864	0.9069	0.9772	1	1	0.883	0.956	0.9538	0.9524	1
LT00110	repeat	1025.56	0.9011	0.9302	0.9172	0.7853	0.9699	0.9929	0.9497	0.8919	0.9877	0.7428	0.7573	0.9925	0.9426	0.8604	0.9906	0.9421	1	0.8861	1	0.9772	1	1	0.883	0.956	0.9538	0.9239	1
LT00113	control	1061.46	0.9011	0.9302	0.796	0.7418	0.9699	0.9929	0.9929	0.8919	0.9729	0.7806	0.7321	0.9925	0.9426	0.9641	0.9906	0.9421	1	0.8861	0.8336	0.9772	1	1	0.9095	0.956	0.9538	0.9439	1
LT00113	first	963.916	0.9084	0.8964	0.6421	0.8148	0.9194	0.9518	0.9482	0.8135	0.9729	0.7958	0.7139	0.9925	0.9426	0.9687	0.9906	0.9421	1	0.938	0.8336	0.9772	1	1	0.886	0.956	0.9538	0.9388	1
LT00113	repeat	980.008	0.9011	0.9302	0.8301	0.7853	0.9699	0.9929	0.9666	0.8919	0.9729	0.6886	0.7409	0.9925	0.9426	0.8604	0.9906	0.9421	1	0.8861	1	0.9772	1	1	0.9095	0.956	0.9538	0.9524	0.964
LT00117	control	865.874	0.9084	0.9302	0.8301	0.7095	0.9699	0.9929	0.9666	0.8919	0.9877	0.714	0.699	0.9925	0.9583	0.9687	0.9906	0.9421	1	0.8861	0.9267	0.9772	1	1	0.883	0.956	0.9538	0.9569	1
LT00117	first	1217.1	0.9011	0.8964	0.6421	0.7095	0.9194	0.9518	0.9312	0.8135	0.9729	0.6886	0.6404	0.9925	0.9426	0.897	0.9906	0.9421	1	0.938	1	0.9772	1	1	0.9025	0.956	0.9538	0.9524	1
LT00117	repeat	1169.71	0.9363	0.9302	0.796	0.7853	0.9699	0.9929	0.9497	0.8919	0.9768	0.714	0.7001	0.9925	0.9426	0.8604	0.9906	0.9421	1	0.938	0.9267	0.9772	1	0.7394	0.883	0.956	0.9538	0.9524	1
LT00118	control	795.507	0.9245	0.9302	0.8301	0.7853	0.9699	0.9929	0.9307	0.8919	0.9729	0.7682	0.7011	0.9925	0.9583	0.9931	0.9906	0.9421	1	0.8861	0.9267	0.9772	1	1	0.89	0.956	0.9538	0.9524	1
LT00118	first	1078.95	0.9011	0.8964	0.6274	0.7095	0.9194	0.9518	0.8789	0.8135	0.9729	0.6886	0.65	0.9925	0.9426	0.9054	0.9906	0.9421	1	0.9152	0.9267	0.9772	1	0.7671	0.8666	0.956	0.9538	0.9388	1
LT00118	repeat	1270.86	0.958	0.9302	0.796	0.833	0.9699	0.9929	0.9138	0.8919	0.9808	0.7137	0.7409	0.9925	0.9426	0.9047	0.9906	0.9421	1	0.938	0.9267	0.9772	1	0.7671	0.89	0.956	0.9538	0.9239	1
LT00119	control	981.936	0.9215	0.9302	0.796	0.739	0.9699	0.9929	0.9307	0.8919	0.9877	0.7137	0.6965	0.9925	0.9583	0.9687	0.9906	0.9421	1	0.8861	0.8336	0.9772	1	1	0.9095	0.956	0.9538	0.9289	1
LT00119	first	1109.66	0.9035	0.8964	0.6705	0.8148	0.9194	0.9518	0.957	0.8135	0.9729	0.7378	0.7743	0.9925	0.9426	0.894	0.9906	0.9421	1	0.938	0.9267	0.9772	1	1	0.9025	0.956	0.9538	0.9388	1
LT00119	repeat	1198.32	0.9424	0.9302	0.796	0.7572	0.9699	0.9929	0.9307	0.8919	0.9808	0.7106	0.6439	0.9925	0.9426	0.8604	0.9906	0.9421	1	0.938	0.9267	0.9772	1	1	0.8871	0.956	0.9538	0.9375	1
LT00121	control	1030.71	0.9215	0.9302	0.834	0.7853	0.9699	0.9929	0.9312	0.8919	0.9729	0.7496	0.6958	0.9925	0.9426	0.9931	0.9906	0.9421	1	0.956	1	0.9772	1	0.5066	0.8632	0.956	0.9538	0.9375	1
LT00121	first	1153.21	0.9359	0.9302	0.796	0.7095	0.9699	0.9929	0.9138	0.8919	0.9768	0.7416	0.7146	0.9925	0.9426	0.8604	0.9906	0.9421	1	0.91	1	0.9772	1	0.7394	0.9025	0.956	0.9538	0.9524	1
LT00121	repeat	1142.85	0.9267	0.9302	0.853	0.7095	0.9699	0.9929	0.8789	0.8919	0.9771	0.714	0.7011	0.9925	0.9426	0.939	0.9906	0.9421	1	0.9152	1	0.9772	1	1	0.8892	0.956	0.9538	0.9375	1
LT00122	control	1087.67	0.9074	0.9302	0.8603	0.7095	0.9699	0.9929	0.9742	0.8919	0.9729	0.8045	0.7011	0.9925	0.9583	0.9931	0.9906	0.9421	1	0.8861	0.9267	0.9772	1	1	0.9095	0.956	0.9538	0.973	1
LT00122	first	996.531	0.9215	0.8964	0.6421	0.7853	0.9194	0.9518	0.9482	0.8135	0.9877	0.7394	0.7584	0.9925	0.9583	0.9931	0.9906	0.9421	1	0.938	0.8336	0.9772	1	1	0.893	0.956	0.9538	0.9388	1
LT00122	repeat	1119.97	0.9215	0.9302	0.796	0.7853	0.9699	0.9929	0.9497	0.8919	0.9768	0.7682	0.6958	0.9925	0.9583	0.9382	0.9906	0.9421	1	0.938	0.9267	0.9772	1	1	0.9025	0.956	0.9538	0.9375	1
LT00123	control	1107.15	0.9011	0.9302	0.8305	0.8148	0.9699	0.9747	0.9307	0.8919	0.9729	0.7806	0.6986	0.9925	0.9426	0.8604	0.9906	0.9421	1	0.9171	0.9267	0.9772	1	1	0.9095	0.956	0.9538	0.9524	1
LT00123	first	937.244	0.9211	0.8964	0.6421	0.8527	0.9194	0.9518	0.9929	0.8135	0.9729	0.7682	0.7569	0.9925	0.9426	0.8604	0.9906	0.9421	1	0.8861	0.9267	0.9772	1	0.7671	0.8706	0.956	0.8837	0.9239	1
LT00123	repeat	1074.58	0.9215	0.9302	0.796	0.739	0.9699	0.9929	0.9497	0.8919	0.9729	0.6886	0.6958	0.9925	0.9426	0.8604	0.9906	0.9421	1	0.8861	0.9267	0.9772	1	1	0.9025	0.956	0.9538	0.9375	1
LT00125	control	972.562	0.9011	0.9302	0.796	0.8148	0.9699	0.9929	0.9307	0.8919	0.9729	0.714	0.7004	0.9925	0.9426	0.894	0.9906	0.9421	1	0.8861	1	0.9772	1	1	0.9095	0.956	0.9538	0.9474	1
LT00125	first	1235.68	0.9035	0.8964	0.6421	0.739	0.9194	0.9518	0.9307	0.8135	0.9729	0.714	0.7271	0.9925	0.9426	0.894	0.9906	0.9421	1	0.8861	0.9069	0.9772	1	1	0.9243	0.956	0.9538	0.9424	1
LT00125	repeat	1225.08	0.9215	0.9302	0.8599	0.7095	0.9699	0.9929	0.9307	0.8919	0.9729	0.6886	0.6606	0.9925	0.9426	0.9047	0.9906	0.9421	1	0.8861	1	0.9772	1	1	0.9025	0.956	0.9538	0.9424	1
LT00126	control	911.939	0.9011	0.9302	0.796	0.7095	0.9699	0.9929	0.9666	0.8919	0.9729	0.7397	0.6546	0.9925	0.9426	0.9245	0.9906	0.9421	1	0.8861	0.9267	0.9772	1	1	0.89	0.956	0.9538	0.9425	1
LT00126	first	1001.05	0.9035	0.8964	0.6421	0.7095	0.9194	0.9518	0.9312	0.8135	0.9729	0.714	0.7313	0.9925	0.9426	0.8604	0.9906	0.9421	1	0.956	0.8336	0.9772	1	1	0.883	0.956	0.9538	0.9239	1
LT00126	repeat	1094.77	0.9215	0.9302	0.8862	0.7095	0.9699	0.9929	0.9312	0.8919	0.9768	0.6886	0.6027	0.9925	0.9426	0.894	0.9906	0.9421	1	0.938	0.9267	0.9772	1	1	0.883	0.956	0.9538	0.9375	1
LT00127	control	977.284	0.9084	0.9302	0.796	0.7339	0.9699	0.9747	0.9138	0.8919	0.9729	0.7806	0.6756	0.9925	0.9426	0.9687	0.9906	0.9421	1	0.8861	1	0.9772	1	1	0.8831	0.956	0.9538	0.9574	1
LT00127	first	1178.15	0.9045	0.8964	0.6274	0.8316	0.9194	0.9518	0.9307	0.8135	0.9729	0.7264	0.7626	0.9925	0.9426	0.8604	0.9906	0.9421	1	0.938	0.9069	0.9772	1	1	0.8711	0.956	0.9538	0.9388	1
LT00127	repeat	1219.73	0.9484	0.9302	0.796	0.7067	0.9699	0.9929	0.9138	0.8919	0.9808	0.7124	0.6809	0.9925	0.9426	0.9245	0.9906	0.9421	1	0.938	1	0.9772	1	1	0.8781	0.956	0.9538	0.9531	1
LT00128	control	1208.28	0.9215	0.9302	0.796	0.7095	0.9699	0.9929	0.9312	0.8919	0.9729	0.714	0.6549	0.9925	0.9426	0.9047	0.9906	0.9421	1	0.8861	1	0.9772	1	1	0.9025	0.956	0.9538	0.9524	1
LT00128	first	1155.78	0.9036	0.8964	0.6421	0.739	0.9194	0.9518	0.9745	0.8135	0.9729	0.8336	0.7452	0.9925	0.9583	0.9687	0.9906	0.9421	1	0.8861	0.9069	0.9772	1	1	0.9025	0.956	0.9538	0.9524	1
LT00128	repeat	1212.08	0.9263	0.9302	0.796	0.7095	0.9737	0.9929	0.9138	0.8919	0.9729	0.714	0.6756	0.9925	0.9426	0.8604	0.9906	0.9421	1	0.8861	0.9069	0.9772	1	1	0.9025	0.956	0.9538	0.9524	1
LT00094	control	984.085	0.9074	0.9302	0.8154	0.7708	0.9699	0.9747	0.9138	0.8919	0.9729	0.7682	0.7004	0.9925	0.9426	0.894	0.9906	0.9421	1	0.9152	1	0.9772	1	1	0.9095	0.956	0.9538	0.9524	1
LT00094	first	823.08	0.9215	0.8964	0.6421	0.7853	0.9194	0.9336	0.9307	0.8135	0.9729	0.6886	0.7505	0.9925	0.9426	0.8604	0.9906	0.9421	1	0.9228	1	0.9772	1	1	0.886	0.956	0.9538	0.9388	1
LT00094	repeat	926.629	0.9199	0.9302	0.7814	0.7413	0.9699	0.9929	0.9307	0.8919	0.9729	0.714	0.7011	0.9925	0.9426	0.8604	0.9906	0.9421	1	0.8861	1	0.9772	1	1	0.9025	0.956	0.9538	0.9524	1
LT00130	control	998.328	0.9215	0.9302	0.8603	0.8148	0.9699	0.9929	0.9497	0.8919	0.9729	0.7636	0.7011	0.9925	0.9426	0.9245	0.9906	0.9421	1	0.8861	1	0.9772	1	1	0.9025	0.956	0.9538	0.9574	1
LT00130	first	987.126	0.9046	0.8964	0.6421	0.8527	0.9194	0.9518	0.9929	0.8135	0.9729	0.8045	0.8031	0.9925	0.9426	0.894	0.9906	0.9421	1	0.938	1	0.9772	1	1	0.9025	0.956	0.9538	0.9388	1
LT00130	repeat	966.652	0.9452	0.9302	0.796	0.7413	0.9699	0.9929	0.9138	0.8919	0.9729	0.7385	0.6631	0.9925	0.9426	0.8604	0.9906	0.9421	1	0.938	1	0.9772	1	1	0.9025	0.956	0.9538	0.9375	1
LT00131	control	1000.98	0.9046	0.9302	0.8586	0.8148	0.9699	0.9929	0.9482	0.8919	0.9729	0.7682	0.6958	0.9925	0.9426	0.9687	0.9906	0.9421	1	0.8861	1	0.9772	1	1	0.9095	0.956	0.9538	0.9439	1
LT00131	first	1108.8	0.9046	0.9076	0.699	0.8527	0.9194	0.9518	0.9929	0.8135	0.9729	0.8212	0.8006	0.9925	0.9426	0.9626	0.9906	0.9421	1	0.8861	0.9267	0.9772	1	1	0.9189	0.956	0.9538	0.9524	1
LT00131	repeat	1083.31	0.9215	0.9302	0.796	0.7095	0.9699	0.9929	0.9497	0.8919	0.9729	0.7264	0.7168	0.9925	0.9426	0.894	0.9906	0.9421	1	0.8861	0.9267	0.9772	1	1	0.9025	0.956	0.9538	0.9375	1
LT00132	control	996.695	0.9011	0.9302	0.796	0.8031	0.9699	0.9929	0.9929	0.8919	0.9729	0.7682	0.7004	0.9925	0.9426	0.9634	0.9906	0.9421	1	0.8861	0.9267	0.9772	1	1	0.9025	0.956	0.9538	0.9524	0.964
LT00132	first	1126.58	0.9011	0.9076	0.6705	0.7877	0.9194	0.9518	0.9666	0.8135	0.9877	0.7685	0.7711	0.9925	0.9583	0.9382	0.9906	0.9421	1	0.9277	1	0.9772	1	1	0.9025	0.956	0.9538	0.9524	1
LT00132	repeat	1128.94	0.9215	0.9302	0.796	0.7095	0.9699	0.9929	0.9929	0.8919	0.9729	0.7428	0.6958	0.9925	0.9426	0.9626	0.9906	0.9421	1	0.8861	1	0.9772	1	1	0.9025	0.956	0.9538	0.9375	1
LT00134	control	870.166	0.8505	0.9302	0.765	0.8527	0.9699	0.9929	0.957	0.8919	0.9729	0.8045	0.796	0.9925	0.9426	0.9245	0.9906	0.9421	1	0.8861	1	0.9772	1	1	0.9297	0.956	0.9538	0.9631	0.964
LT00134	first	968.442	0.9011	0.8964	0.6705	0.8148	0.9194	0.9518	0.957	0.8135	0.9729	0.8045	0.8017	0.9925	0.9426	0.9382	0.9906	0.9421	1	0.8861	1	0.9772	1	1	0.9095	0.956	0.9538	0.9239	1
LT00134	repeat	1102.13	0.9011	0.9302	0.887	0.8148	0.9699	0.9929	0.957	0.8919	0.9729	0.7518	0.8081	0.9925	0.9426	0.9047	0.9906	0.9421	1	0.876	1	0.9772	1	1	0.9227	0.956	0.9538	0.958	0.964
LT00135	control	715.901	0.8801	0.9302	0.831	0.8527	0.9699	0.9929	0.957	0.9259	0.9729	0.7806	0.8731	0.9925	0.9426	0.9626	0.9906	1	1	0.8861	1	0.9772	1	1	0.9391	0.956	0.9538	0.9612	0.964
LT00135	first	1015.26	0.886	0.8964	0.5903	0.7413	0.9194	0.9518	0.957	0.8135	0.9729	0.7806	0.7441	0.9925	0.9426	0.9047	0.9906	0.9421	1	0.8861	1	0.9772	1	1	0.9025	0.956	0.9538	0.9459	1
LT00135	repeat	957.537	0.899	0.9606	0.8862	0.6263	0.9699	0.9336	0.957	0.8919	0.9561	0.7667	0.8234	0.9925	0.903	0.9382	0.978	0.9421	1	0.8861	1	0.9772	1	1	0.9227	0.956	0.9538	0.9581	0.964
LT00136	control	985.428	0.9011	0.9302	0.8245	0.8148	0.9699	0.9747	0.9666	0.8919	0.9729	0.7394	0.7701	0.9925	0.9426	0.9291	0.9906	0.9421	1	0.8861	1	0.9772	1	1	0.9025	0.956	0.9538	0.9524	1
LT00136	first	1071.52	0.9247	0.9302	0.796	0.7306	0.9699	0.9929	0.9497	0.8919	0.9808	0.6886	0.7438	0.9925	0.9426	0.894	0.9906	0.9421	1	0.8861	0.836	0.9772	1	0.5066	0.8706	0.956	0.9538	0.9124	0.9064
LT00136	repeat	984.797	0.9036	0.9606	0.796	0.608	0.9699	0.946	0.9138	0.8919	0.9561	0.714	0.7438	0.9925	0.9032	0.8604	0.9906	0.9421	1	0.8861	0.9069	0.9772	1	1	0.9025	0.956	0.9538	0.9388	1
LT00137	control	844.3	0.9059	0.9302	0.8599	0.8527	0.9699	0.9929	0.9307	0.8919	0.9768	0.7428	0.7011	0.9925	0.9583	0.9291	0.9906	0.9421	1	0.8861	0.9267	0.9772	1	1	0.9025	0.956	0.9538	0.968	1
LT00137	first	1040.27	0.9245	0.9302	0.796	0.7095	0.9699	0.9929	0.9497	0.8919	0.9729	0.7682	0.6606	0.9925	0.9426	0.8604	0.9906	0.9421	1	0.8861	0.9267	0.9772	1	1	0.9189	0.956	0.9538	0.9459	1
LT00137	repeat	900.195	0.8985	0.9302	0.796	0.5589	0.9699	0.946	0.9138	0.8919	0.9561	0.7428	0.6756	0.9925	0.903	0.894	0.9906	0.9421	1	0.8861	0.9267	0.9772	1	1	0.9025	0.9271	0.9538	0.9372	1
LT00138	control	1005.24	0.9215	0.9302	0.796	0.8148	0.9699	0.9929	0.9138	0.8919	0.9729	0.7394	0.6741	0.9925	0.9426	0.9245	0.9906	0.9421	1	0.8861	1	0.9772	1	1	0.9025	0.956	0.9538	0.9524	1
LT00138	first	996.334	0.9084	0.9094	0.796	0.7853	0.9923	0.9929	0.9497	0.8919	0.9729	0.7124	0.7011	0.9925	0.9426	0.894	0.9906	0.9421	1	0.876	1	0.9772	1	1	0.9025	0.956	0.9538	0.9459	0.964
LT00138	repeat	991.393	0.9263	0.9302	0.8603	0.5589	0.9923	0.946	0.9666	0.8919	0.9561	0.7958	0.7306	0.9925	0.903	0.8604	0.9906	0.9421	1	0.9038	1	0.9772	1	1	0.888	0.956	0.9538	0.9375	1
LT00140	control	949.89	0.9215	0.9302	0.7814	0.8527	0.9699	0.9929	0.9312	0.8919	0.9729	0.7682	0.705	0.9925	0.9583	0.9245	0.9906	0.9421	1	0.8861	1	0.9772	1	1	0.9445	0.956	0.9538	0.9583	0.964
LT00140	first	1062.76	0.975	0.9302	0.9172	0.8826	0.9699	0.9929	0.9929	0.8919	0.9768	0.8336	0.8731	0.9925	0.9426	0.9886	0.9906	0.9421	1	0.938	1	0.9772	1	1	0.9173	0.956	0.9538	0.9524	1
LT00140	repeat	836.599	0.9011	0.9302	0.7814	0.5589	0.9699	0.946	0.9312	0.8919	0.9561	0.7682	0.7004	0.9925	0.903	0.8604	0.9906	0.9421	1	0.8861	1	0.9772	1	1	0.9227	0.956	0.9538	0.9328	1
LT00142	control	955.233	0.9045	0.9302	0.8603	0.7601	0.9699	0.9929	0.9666	0.8919	0.9877	0.714	0.7008	0.9925	0.9583	0.9687	0.9906	0.9421	1	0.8861	1	0.9772	1	1	0.9025	0.956	0.9538	0.9544	1
LT00142	first	694.24	0.9488	0.9606	0.796	0.8036	0.9699	0.9929	0.9497	0.8919	0.9916	0.6886	0.7011	0.9925	0.9583	0.958	0.9906	0.8711	1	0.8766	0.829	0.9772	1	0.5066	0.8038	0.956	0.8837	0.8972	0.8539
LT00142	repeat	758.499	0.9045	0.9302	0.8301	0.58	0.9508	0.946	0.9631	0.8919	0.9709	0.6886	0.7008	0.9925	0.903	0.8604	0.9906	0.9421	1	0.8861	1	0.9772	1	1	0.9025	0.956	0.9538	0.9388	1
LT00143	control	907.145	0.9011	0.9302	0.853	0.8087	0.9699	0.9929	0.9666	0.8919	0.9729	0.7667	0.7477	0.9925	0.9426	0.9047	0.9906	0.8914	1	0.8861	0.9267	0.9772	1	1	0.8852	0.9235	0.7475	0.9535	0.9396
LT00143	first	1172.9	0.9267	0.9302	0.8245	0.7853	0.9699	0.9929	0.9482	0.8919	0.9768	0.7518	0.7011	0.9925	0.9426	0.9245	0.9906	0.9421	1	0.938	0.9267	0.9772	1	1	0.9095	0.956	0.9538	0.9615	1
LT00143	repeat	1020.03	0.9119	0.9302	0.8245	0.5884	0.9699	0.946	0.9929	0.8919	0.9561	0.7428	0.7427	0.9925	0.903	0.9634	0.9906	0.9421	1	0.8861	0.9267	0.9772	1	1	0.9173	0.956	0.9538	0.9328	1
LT00145	control	1067.59	0.9144	0.9302	0.8301	0.7095	0.9699	0.9929	0.9312	0.8919	0.9877	0.7428	0.6756	0.9925	0.9675	0.9626	0.9906	0.9421	1	0.938	0.9069	0.9772	1	1	0.9025	0.956	0.9538	0.9524	1
LT00145	first	1030.42	0.9392	0.9302	0.9172	0.8826	0.9923	0.9929	0.9929	0.9973	0.9729	0.7806	0.8717	0.9925	0.9426	0.9695	0.9906	0.9421	1	0.938	0.9069	0.9772	1	0.7394	0.9095	0.956	0.9538	0.9314	1
LT00145	repeat	894.127	0.9029	0.9302	0.8301	0.5772	0.9699	0.946	0.9666	0.8919	0.9748	0.7397	0.6748	0.9925	0.903	0.9626	0.9906	0.9421	1	0.8861	0.8336	0.9772	1	1	0.9025	0.956	0.9538	0.9178	1
LT00098	control	793.39	0.8987	0.9302	0.796	0.7413	0.9699	0.9929	0.9138	0.8919	0.9729	0.7682	0.7008	0.9925	0.9426	0.9382	0.9906	0.9421	1	0.8861	0.9069	0.9772	1	1	0.9095	0.956	0.9538	0.9573	1
LT00098	first	907.833	0.9011	0.8964	0.6705	0.7708	0.9194	0.9518	0.9497	0.8135	0.9877	0.7428	0.6944	0.9925	0.9426	0.9687	0.9906	0.9421	1	0.9108	1	0.9772	1	1	0.9095	0.956	0.9538	0.9574	1
LT00098	repeat	918.534	0.9074	0.9302	0.796	0.7095	0.9699	0.9929	0.9307	0.8919	0.9729	0.7428	0.6567	0.9925	0.9426	0.8604	0.9906	0.9421	1	0.8861	1	0.9772	1	1	0.9095	0.956	0.9538	0.9388	1
LT00043	control	819.804	0.8625	0.9058	0.6649	0.7198	0.9699	0.9929	0.9307	0.8919	0.9729	0.6814	0.5832	0.9925	0.927	0.9245	0.9906	0.8893	1	0.9103	1	0.9772	1	0.7394	0.9095	0.956	0.9538	0.9524	1
LT00043	first	1205.59	0.7877	0.8918	0.8775	0.8527	0.9699	0.9929	0.9929	0.7543	0.9499	0.8336	0.7836	0.9925	0.9426	0.9382	0.9067	0.8897	0.8761	0.7858	0.9098	0.9129	1	0.7671	0.7274	0.7494	0.7129	0.8189	0.7669
LT00043	repeat	611.812	0.8613	0.8958	0.7223	0.7853	0.9699	0.9929	0.9138	0.8919	0.9729	0.6886	0.6752	0.9925	0.9294	0.8604	0.9906	0.9421	1	0.8861	0.8336	0.9772	1	1	0.8871	0.9271	0.9538	0.9364	1
LT00052	control	1127.82	0.9144	0.9302	0.9172	0.7853	0.9699	0.9929	0.957	0.8919	0.9768	0.7682	0.8088	0.9925	0.9426	0.9245	0.9906	0.9421	1	0.9288	0.829	0.9772	1	0.5066	0.8632	0.956	0.8837	0.9309	0.9423
LT00052	first	1504.8	0.8312	0.847	0.6762	0.6885	0.9699	0.9747	0.8789	0.7543	0.9499	0.5538	0.5448	0.9925	0.9675	0.9687	0.9067	0.8897	0.875	0.786	0.8162	0.9129	1	0.7671	0.7273	0.7779	0.7129	0.7983	0.7669
LT00052	repeat	1365.19	0.9215	0.9302	0.796	0.5589	0.9699	0.946	0.9307	0.8919	0.9561	0.6886	0.635	0.9925	0.903	0.9245	0.9906	0.9421	1	0.8861	1	0.9772	1	1	0.9025	0.956	0.9538	0.9574	1
LT00055	control	981.447	0.9261	0.9302	0.853	0.7853	0.9699	0.9929	0.9138	0.8919	0.9916	0.7428	0.7182	0.9925	0.9426	0.8604	0.9906	0.8711	1	0.8594	0.7557	0.9772	0.9653	0.345	0.7895	0.956	0.7665	0.894	0.8899
LT00055	first	1513.81	0.8645	0.8918	0.9034	0.8527	0.9699	0.9929	0.957	0.7543	0.9538	0.8336	0.8014	0.9925	0.9426	0.9634	0.9067	0.8897	0.8761	0.8374	0.8365	0.9127	1	0.7671	0.7152	0.7781	0.7129	0.8033	0.7666
LT00055	repeat	1340.8	0.8987	0.8965	0.737	0.5589	0.9699	0.946	0.9138	0.8919	0.9561	0.6886	0.6756	0.9925	0.903	0.9245	0.9906	0.9421	1	0.8861	0.9267	0.9772	1	1	0.9189	0.956	0.9538	0.9574	1
LT00058	control	433.595	0.9215	0.9302	0.796	0.7984	0.9699	0.9929	0.9307	0.8919	0.9808	0.6886	0.7498	0.9925	0.9426	0.8604	0.9906	0.6455	1	0.7838	0.5951	0.8536	1	0.1747	0.7497	0.9267	0.6287	0.7815	0.7498
LT00058	first	1598.45	0.8585	0.8806	0.7443	0.7095	0.9699	0.9929	0.8789	0.7543	0.9499	0.7093	0.6134	0.9925	0.9426	0.9336	0.9067	0.8897	0.875	0.7757	0.9092	0.9129	1	0.7671	0.7081	0.7781	0.7137	0.819	0.7666
LT00058	repeat	1240.96	0.9011	0.9302	0.853	0.5589	0.9699	0.946	0.957	0.8919	0.9561	0.6886	0.6756	0.9925	0.903	0.9886	0.9906	0.9421	1	0.8861	1	0.9772	1	1	0.9034	0.956	0.9538	0.9629	1
LT00059	control	779.519	0.9129	0.9302	0.796	0.7708	0.9699	0.9929	0.957	0.8919	0.9729	0.6886	0.6748	0.9925	0.9426	0.8604	0.9906	0.9421	1	0.9152	1	0.9772	1	1	0.9025	0.956	0.9538	0.9375	1
LT00059	first	1431.95	0.8382	0.8806	0.8301	0.7413	0.9699	0.9929	0.9312	0.7543	0.9499	0.6839	0.6539	0.9925	0.9426	0.9047	0.9067	0.9472	0.875	0.7757	0.9098	0.9127	1	0.7671	0.7408	0.7779	0.7137	0.819	0.7306
LT00059	repeat	1111.29	0.8891	0.8965	0.8154	0.5589	0.9699	0.946	0.9138	0.8919	0.9561	0.6886	0.6297	0.9925	0.903	0.9886	0.9906	0.9421	1	0.8861	1	0.9772	1	1	0.9392	0.956	0.9538	0.9514	1
LT00044	control	933.351	0.8738	0.8965	0.7814	0.7306	0.9699	0.9929	0.957	0.8919	0.9729	0.7078	0.6123	0.9925	0.9426	0.8604	0.9906	0.9421	1	0.938	0.9069	0.9772	1	1	0.9025	0.956	0.9538	0.9375	1
LT00044	first	782.108	0.8697	0.8806	0.796	0.7095	0.9699	0.9929	0.9138	0.7543	0.9499	0.714	0.6183	0.9925	0.9583	0.8604	0.9067	0.6616	0.8103	0.6136	0.4956	0.7061	0.9648	0	0.3375	0.6737	0	0.6334	0.3781
LT00044	repeat	1168.54	0.9423	0.9302	0.796	0.7095	0.9699	0.9929	0.8789	0.8919	0.9729	0.6886	0.6237	0.9925	0.9426	0.8604	0.9906	0.9421	1	0.9018	1	0.9772	1	1	0.9025	0.956	0.9538	0.968	1
LT00070	control	1073.2	0.8801	0.9302	0.7991	0.8527	0.9699	0.9929	0.9929	0.8919	0.9877	0.8212	0.7374	0.9925	0.9426	0.9687	0.9906	0.9421	1	0.8861	0.9069	0.9772	1	1	0.9095	0.956	0.9538	0.9665	1
LT00070	first	782.216	0.9215	0.8756	0.699	0.8148	0.9194	0.9518	0.9927	0.8135	0.9768	0.7682	0.8319	0.9925	0.9675	0.9931	0.9906	0.9421	1	0.8861	0.9267	0.9772	1	1	0.9189	0.956	0.9538	0.958	0.964
LT00070	repeat	1146.58	0.9011	0.9302	0.796	0.8087	0.9699	0.9929	0.9745	0.8919	0.9729	0.7428	0.7697	0.9925	0.9426	0.8604	0.9906	0.9421	1	0.8861	1	0.9772	1	1	0.9189	0.956	0.9538	0.9531	0.964
LT00045	control	1003.57	0.8738	0.8965	0.737	0.7203	0.9699	0.9929	0.8632	0.8919	0.9729	0.648	0.5682	0.9925	0.9426	0.8604	0.9906	0.9421	1	0.8861	1	0.9772	1	1	0.9095	0.956	0.9538	0.9524	1
LT00045	first	1455.16	0.8677	0.8806	0.796	0.7095	0.9699	0.9929	0.9497	0.7543	0.9499	0.6886	0.6237	0.9925	0.9583	0.9336	0.9067	0.8897	0.875	0.8377	0.8168	0.9129	0.9653	0.7671	0.726	0.7783	0.7137	0.7982	0.7666
LT00045	repeat	1192.15	0.8991	0.9606	0.796	0.7853	0.9699	0.9929	0.9929	0.8919	0.9729	0.6886	0.7967	0.9925	0.9426	0.9245	0.9906	0.9421	1	0.8861	0.829	0.9772	0.9653	1	0.9025	0.956	0.9538	0.9425	1
LT00072	control	1060.57	0.9011	0.9414	0.796	0.8087	0.9699	0.9929	0.957	0.8919	0.9729	0.6994	0.666	0.9925	0.9426	0.894	0.9906	0.9421	1	0.8861	0.9267	0.9772	1	1	0.9095	0.956	0.9538	0.9574	1
LT00072	first	929.583	0.9215	0.8964	0.6421	0.7423	0.9194	0.9518	0.9307	0.8135	0.9729	0.6886	0.6702	0.9925	0.9675	0.9626	0.9906	0.9421	1	0.8861	0.8336	0.9772	1	1	0.8871	0.956	0.9538	0.9424	1
LT00072	repeat	1075.45	0.8942	0.9302	0.793	0.739	0.9699	0.9929	0.9138	0.8919	0.9729	0.6886	0.6574	0.9925	0.9426	0.8604	0.9906	0.9421	1	0.8861	0.9267	0.9772	1	1	0.9259	0.956	0.9538	0.9276	1
LT00073	control	1088.37	0.9045	0.9302	0.8245	0.7395	0.9699	0.9929	0.9138	0.8919	0.9729	0.7682	0.5832	0.9925	0.9426	0.9245	0.9906	0.9421	1	0.8861	0.8336	0.9772	1	1	0.9095	0.956	0.9538	0.9524	1
LT00073	first	848.389	0.9215	0.8964	0.699	0.8527	0.9194	0.9518	0.9851	0.8135	0.9729	0.7958	0.7139	0.9925	0.9426	0.9382	0.9906	0.9421	1	0.8861	0.8563	0.9772	1	1	0.9025	0.956	0.9538	0.9681	1
LT00073	repeat	955.127	0.8939	0.9302	0.853	0.7095	0.9699	0.9929	0.9312	0.8919	0.9729	0.714	0.5832	0.9925	0.9426	0.8604	0.9906	0.9421	1	0.8861	0.8487	0.9772	1	1	0.9025	0.956	0.9538	0.9239	1
LT00074	control	1155.7	0.9075	0.9302	0.796	0.739	0.9699	0.9929	0.8789	0.8919	0.9729	0.6886	0.629	0.9925	0.9426	0.894	0.9906	0.9421	1	0.938	0.8336	0.9772	1	0.7671	0.8632	0.956	0.8837	0.9314	1
LT00074	first	750.804	0.9247	0.8964	0.6421	0.7095	0.9194	0.9518	0.9138	0.8135	0.9768	0.6886	0.6756	0.9925	0.9675	0.9931	0.9906	0.9421	1	0.8861	0.9267	0.9772	1	1	0.9025	0.956	0.9538	0.9394	1
LT00074	repeat	929.314	0.9216	0.9302	0.796	0.7095	0.9699	0.9929	0.9297	0.8919	0.9808	0.7124	0.6649	0.9925	0.9426	0.8604	0.9906	0.9421	1	0.9152	0.9267	0.9772	1	1	0.8706	0.956	0.9538	0.9375	1
LT00075	control	1119.85	0.8738	0.8285	0.718	0.6403	0.9699	0.9929	0.8938	0.8919	0.9729	0.5603	0.538	0.9925	0.9426	0.8604	0.9906	0.9421	1	0.8861	0.9069	0.9772	1	1	0.9095	0.956	0.9538	0.9475	1
LT00075	first	851.312	0.9311	0.8964	0.6421	0.8527	0.9194	0.9518	0.9138	0.8135	0.9729	0.7688	0.747	0.9925	0.9583	0.9931	0.9906	0.9421	1	0.8766	0.829	0.9772	1	0.5066	0.8443	0.956	0.8837	0.9275	0.9423
LT00075	repeat	743.964	0.8942	0.8622	0.7176	0.7853	0.9699	0.9747	0.9138	0.8919	0.9729	0.6777	0.527	0.9925	0.9426	0.8604	0.9906	0.9421	1	0.8861	0.9069	0.9772	1	0.5066	0.8726	0.956	0.8837	0.9375	1
LT00076	control	1007.26	0.9074	0.9014	0.7443	0.7095	0.9699	0.9929	0.9312	0.8919	0.9729	0.6563	0.5707	0.9925	0.9426	0.8604	0.9906	0.9421	1	0.9217	0.9267	0.9772	1	1	0.9103	0.956	0.9538	0.9514	1
LT00076	first	886.418	0.9306	0.8964	0.6421	0.8723	0.9194	0.9518	0.9929	0.8135	0.9768	0.7428	0.8081	0.9925	0.9426	0.894	0.9906	0.9421	1	0.8861	0.9267	0.9772	1	0.7394	0.883	0.956	0.9538	0.9524	1
LT00076	repeat	761.317	0.8942	0.8622	0.7589	0.7095	0.9699	0.9929	0.8632	0.8919	0.9729	0.5999	0.6304	0.9925	0.9426	0.8604	0.9906	0.9421	1	0.8861	0.8336	0.9772	1	0.5066	0.8367	0.956	0.9538	0.9314	1
LT00078	control	1052.81	0.9011	0.9302	0.796	0.7703	0.9699	0.9929	0.9307	0.8919	0.9729	0.7518	0.6809	0.9925	0.9426	0.9245	0.9906	0.9421	1	0.8861	0.9069	0.9772	1	1	0.9095	0.956	0.9538	0.9437	1
LT00078	first	739.693	0.9267	0.8964	0.6421	0.8148	0.9194	0.9518	0.957	0.8135	0.9729	0.7428	0.7011	0.9925	0.9583	0.9245	0.9906	0.9421	1	0.8864	0.9069	0.9772	1	1	0.9025	0.956	0.9538	0.9388	1
LT00078	repeat	818.296	0.9215	0.9302	0.796	0.7095	0.9699	0.9929	0.9138	0.8919	0.9729	0.6886	0.6482	0.9925	0.9426	0.8604	0.9906	0.9421	1	0.938	1	0.9772	1	1	0.9095	0.956	0.9538	0.9524	1
LT00079	control	1074.1	0.891	0.9302	0.8245	0.8148	0.9699	0.9929	0.9929	0.8919	0.9729	0.7998	0.7072	0.9925	0.9426	0.9886	0.9906	0.9421	1	0.8861	0.7557	0.9772	1	0.7671	0.886	0.956	0.9538	0.9288	1
LT00079	first	787.21	0.8942	0.8964	0.6421	0.7095	0.9194	0.9518	0.9138	0.8135	0.9729	0.6886	0.6006	0.9925	0.9426	0.8604	0.9906	0.9421	1	0.938	0.8336	0.9772	1	1	0.89	0.956	0.9538	0.9524	1
LT00079	repeat	756.171	0.9011	0.9302	0.796	0.6885	0.9699	0.9929	0.9312	0.8919	0.9729	0.714	0.6553	0.9925	0.9426	0.894	0.9906	0.9421	1	0.8861	1	0.9772	1	1	0.9095	0.956	0.9538	0.9544	0.964
LT00080	control	1122.88	0.9046	0.9302	0.8603	0.7708	0.9699	0.9929	0.9666	0.8919	0.9729	0.7667	0.731	0.9925	0.9426	0.9931	0.9906	0.9421	1	0.8861	0.8336	0.9772	1	0.5066	0.9025	0.956	0.9538	0.9323	1
LT00080	first	1063.74	0.9215	0.8757	0.6421	0.7095	0.9194	0.9518	0.9497	0.8135	0.9877	0.6886	0.6027	0.9925	0.9426	0.8604	0.9906	0.9421	1	0.938	0.9069	0.9772	1	1	0.9095	0.956	0.9538	0.9524	1
LT00080	repeat	1004.17	0.9305	0.9302	0.796	0.7413	0.9699	0.9929	0.9497	0.8919	0.9729	0.6886	0.7914	0.9925	0.9426	0.9626	0.9906	0.9421	1	0.938	1	0.9772	1	1	0.9297	0.956	0.9538	0.9524	0.964
LT00081	control	1083.02	0.9033	0.9302	0.796	0.7095	0.9699	0.9823	0.9312	0.8919	0.9877	0.714	0.6756	0.9925	0.9583	0.9245	0.9906	0.9421	1	0.8861	0.8336	0.9772	1	1	0.9095	0.956	0.9538	0.9524	1
LT00081	first	989.162	0.9237	0.8964	0.6421	0.8826	0.9194	0.9336	0.9929	0.8135	0.9916	0.7682	0.7146	0.9925	0.9583	0.9626	0.9906	0.9421	1	0.9364	0.8336	0.9772	1	1	0.893	0.956	0.9538	0.9524	1
LT00081	repeat	1105.44	0.9215	0.93	0.8301	0.7095	0.9699	0.9747	0.9312	0.8919	0.9768	0.7143	0.6958	0.9925	0.9426	0.8604	0.9906	0.9421	1	0.8861	0.9267	0.9772	1	1	0.9025	0.956	0.9538	0.9524	1
LT00046	control	1029.87	0.9215	0.9302	0.765	0.7095	0.9699	0.9929	0.9307	0.8919	0.9768	0.714	0.7296	0.9925	0.9426	0.8604	0.9906	0.9421	1	0.8861	0.9069	0.9772	1	0.7394	0.8871	0.956	0.9538	0.9375	1
LT00046	first	1452.18	0.886	0.8806	0.853	0.8148	0.9699	0.9929	0.9307	0.7543	0.9578	0.7667	0.7836	0.9925	0.9426	0.894	0.9067	0.8897	0.8761	0.8377	0.9098	0.9127	1	0.7671	0.751	0.7783	0.7137	0.8288	0.7669
LT00046	repeat	1171.56	0.9449	0.9302	0.796	0.7853	0.9699	0.9929	0.9138	0.8919	0.9768	0.7428	0.7967	0.9925	0.9426	0.9245	0.9906	0.9421	1	0.8861	1	0.9772	1	1	0.9227	0.956	0.9538	0.973	1
LT00082	control	1024.57	0.9084	0.9302	0.796	0.7095	0.9699	0.9929	0.9497	0.8919	0.9729	0.714	0.6539	0.9925	0.9426	0.9886	0.9906	0.9421	1	0.9152	0.8336	0.9772	1	1	0.9095	0.956	0.9538	0.9524	1
LT00082	first	928.869	0.9215	0.8964	0.6421	0.8527	0.9194	0.9518	0.9929	0.8135	0.9768	0.7682	0.7722	0.9925	0.9426	0.894	0.9906	0.9421	1	0.938	0.9267	0.9772	1	1	0.9095	0.956	0.9538	0.9524	1
LT00082	repeat	985.233	0.9215	0.8965	0.7646	0.7095	0.9699	0.9929	0.915	0.8919	0.9729	0.6886	0.6756	0.9925	0.9426	0.8604	0.9906	0.9421	1	0.929	0.8336	0.9772	1	1	0.9025	0.956	0.9538	0.9524	1
LT00085	control	1052.47	0.8908	0.9302	0.796	0.7095	0.9699	0.9929	0.9135	0.8919	0.9729	0.6839	0.5373	0.9925	0.9583	0.9687	0.9906	0.9421	1	0.8861	0.8336	0.9772	1	1	0.9095	0.956	0.9538	0.9574	1
LT00085	first	636.915	0.9245	0.8964	0.6421	0.7853	0.9194	0.9518	0.9138	0.8135	0.9768	0.7428	0.7011	0.9925	0.9583	0.9375	0.9906	0.9421	1	0.9377	0.8487	0.9772	1	1	0.9025	0.956	0.9538	0.9239	1
LT00085	repeat	707.058	0.8898	0.8622	0.7533	0.7095	0.9699	0.9929	0.9138	0.8919	0.9729	0.6839	0.5611	0.9925	0.9426	0.8604	0.9906	0.9421	1	0.938	0.8336	0.9772	1	1	0.9025	0.956	0.9538	0.9524	1
LT00086	control	1177.59	0.9183	0.9302	0.8301	0.7413	0.9699	0.9929	0.9307	0.8919	0.9729	0.5968	0.6752	0.9925	0.9426	0.894	0.9906	0.9421	1	0.9396	0.9069	0.9772	1	0.5066	0.8632	0.956	0.8837	0.9145	1
LT00086	first	759.26	0.9069	0.8396	0.6244	0.7095	0.9194	0.9518	0.8789	0.8135	0.9768	0.5519	0.5235	0.9925	0.9675	0.9931	0.9906	0.9421	1	0.938	0.9069	0.9772	1	1	0.9095	0.956	0.9538	0.9524	1
LT00086	repeat	869.173	0.9215	0.9302	0.8603	0.7413	0.9699	0.9929	0.9138	0.8919	0.9729	0.6839	0.6748	0.9925	0.9426	0.8604	0.9906	0.9421	1	0.938	1	0.9772	1	1	0.9025	0.956	0.9538	0.9375	1
LT00088	control	1106.09	0.9045	0.9302	0.8301	0.7853	0.9699	0.9929	0.9307	0.8919	0.9729	0.7682	0.6752	0.9925	0.9426	0.9245	0.9906	0.9421	1	0.9144	0.9267	0.9772	1	1	0.9095	0.956	0.9538	0.9485	1
LT00088	first	764.104	0.9251	0.8964	0.6421	0.8527	0.9194	0.9518	0.957	0.8135	0.9768	0.7518	0.7409	0.9925	0.9583	0.9245	0.9906	0.9421	1	0.938	0.9267	0.9772	1	1	0.9025	0.956	0.9538	0.9388	1
LT00088	repeat	824.99	0.9074	0.9302	0.7814	0.7095	0.9699	0.9929	0.9138	0.8919	0.9729	0.714	0.6546	0.9925	0.9426	0.8604	0.9906	0.9421	1	0.8861	0.9267	0.9772	1	1	0.9025	0.956	0.9538	0.968	1
LT00089	control	1080.76	0.9011	0.9302	0.8603	0.7708	0.9699	0.9929	0.9666	0.8919	0.9729	0.771	0.7136	0.9925	0.9426	0.9245	0.9906	0.9421	1	0.9152	0.9069	0.9772	1	1	0.9095	0.956	0.9538	0.9375	1
LT00089	first	812.091	0.9267	0.8964	0.6421	0.8148	0.9194	0.9518	0.9666	0.8135	0.9729	0.7428	0.7246	0.9925	0.9675	0.9626	0.9906	0.9421	1	0.938	0.9069	0.9772	1	1	0.9025	0.956	0.9538	0.9388	1
LT00089	repeat	890.113	0.8835	0.9414	0.796	0.7311	0.9699	0.9929	0.9497	0.8919	0.9877	0.7428	0.6702	0.9925	0.9426	0.8604	0.9906	0.9421	1	0.8861	1	0.9772	1	1	0.9095	0.956	0.9538	0.968	0.964
LT00090	control	1124.45	0.9035	0.9302	0.796	0.7708	0.9699	0.9929	0.9307	0.8919	0.9729	0.7428	0.7566	0.9925	0.9552	0.9687	0.9906	0.9421	1	0.8861	0.9069	0.9772	1	0.7394	0.9095	0.956	0.9538	0.9464	1
LT00090	first	1043.95	0.9215	0.8964	0.699	0.739	0.9194	0.9518	0.9307	0.8135	0.9729	0.7428	0.7441	0.9925	0.9583	0.9687	0.9906	0.9421	1	0.938	1	0.9772	1	1	0.886	0.956	0.9538	0.9493	1
LT00090	repeat	1085.67	0.9046	0.9302	0.8603	0.7853	0.9699	0.9929	0.9138	0.8919	0.9729	0.6886	0.7253	0.9925	0.9426	0.894	0.9906	0.9421	1	0.8861	1	0.9772	1	1	0.9095	0.956	0.9538	0.9388	1
LT00047	control	782.809	0.8662	0.7989	0.599	0.6403	0.9349	0.9929	0.8417	0.797	0.9729	0.5593	0.5028	0.9925	0.9426	0.8604	0.9906	0.9421	1	0.9152	0.9267	0.9772	1	1	0.9095	0.956	0.9538	0.968	1
LT00047	first	1444.19	0.8662	0.8806	0.7451	0.7413	0.9699	0.9768	0.8632	0.7543	0.9578	0.7911	0.5832	0.9925	0.9426	0.8947	0.9067	0.8897	0.875	0.8374	0.7429	0.9127	1	0.5066	0.681	0.7777	0.5256	0.7815	0.7089
LT00047	repeat	1127.26	0.845	0.8965	0.8107	0.7226	0.9699	0.9929	0.9312	0.8919	0.9729	0.6498	0.64	0.9925	0.9426	0.8604	0.9906	0.8711	1	0.938	0.7557	0.9772	1	0.5066	0.816	0.956	0.7665	0.9375	0.8899
LT00048	control	742.796	0.8763	0.8738	0.702	0.7095	0.9699	0.9929	0.8632	0.8919	0.9729	0.6198	0.6183	0.9925	0.9426	0.8604	0.9906	0.9421	1	0.9152	0.9267	0.9772	1	0.7671	0.886	0.956	0.9538	0.9181	1
LT00048	first	1365.18	0.8484	0.8806	0.7758	0.7095	0.9699	0.9929	0.9138	0.7543	0.9499	0.6297	0.7008	0.9925	0.9426	0.8604	0.9067	0.8897	0.875	0.7855	0.8365	0.9129	0.9653	0.7671	0.7343	0.7779	0.7137	0.8227	0.7669
LT00048	repeat	1100.69	0.9215	0.9094	0.8603	0.7095	0.9699	0.9929	0.9497	0.8919	0.9768	0.6563	0.635	0.9925	0.9426	0.8604	0.9906	0.9421	1	0.8861	0.9267	0.9772	1	1	0.9189	0.956	0.9538	0.9464	1
LT00049	control	922.073	0.8738	0.93	0.7814	0.7095	0.9699	0.9929	0.8789	0.8919	0.9729	0.6886	0.6493	0.9925	0.9426	0.8604	0.9906	0.9421	1	0.9255	0.9267	0.9772	1	1	0.9095	0.956	0.9538	0.9239	1
LT00049	first	1351.49	0.8046	0.8806	0.8577	0.8527	0.9699	0.9929	0.957	0.7543	0.9499	0.7806	0.8337	0.9925	0.9426	0.9626	0.9067	0.8893	0.875	0.8143	0.8365	0.9127	1	0.7671	0.7439	0.7783	0.7137	0.8131	0.7666
LT00049	repeat	1021.96	0.8857	0.8734	0.796	0.7853	0.9699	0.9929	0.9138	0.8919	0.9729	0.6886	0.6972	0.9925	0.9426	0.8604	0.9906	0.9421	1	0.9108	0.9267	0.9772	1	1	0.9025	0.956	0.9538	0.9574	1
#Coverage for each sample and covered ratio in target sequencing for each to at least 30x
