# Supplementary material for: Exome sequencing identifies somatic mutations in novel driver genes in non-small cell lung cancer
Source: Aging (Albany NY). 2020 Jul 6;12(13):13701–15. doi: 10.18632/aging.103500 (PMC7377869; doi:10.18632/aging.103500)
Supplement: Supplementary Table 4 [file aging-12-103500-s004..xls]

## Sheet: supplement table3
Supplementary Table 4. Variants in 27 candidate genes identified in 88 NSCLC patients
sample	chr	Start	ref	mut	Repeated Or Not	all-dps1	mut-dps1	vaf1	all-dps1	mut-dps1	vaf2	Exonic Func.ref Gene	Gene
LT00013	chr17	7578502	A	T	yes	276	213	0.771739	213	136	0.638498	missense	TP53
LT00016	chr17	7578208	T	C	yes	1339	781	0.583271	1484	350	0.235849	missense	TP53
LT00018	chr17	37872831	G	C	yes	1760	159	0.0903409	1518	178	0.11726	missense	ERBB2
LT00020	chr2	178098960	C	T	yes	1564	928	0.59335	1720	412	0.239535	missense	NFE2L2
LT00020	chr3	178952069	C	G	yes	2515	274	0.108946	2353	180	0.0764981	missense	PIK3CA
LT00020	chr7	140453075	C	A	yes	639	152	0.237872	725	108	0.148966	missense	BRAF
LT00020	chr17	7577046	C	A	yes	1971	726	0.368341	2220	588	0.264865	stop-gained	TP53
LT00021	chr17	7577114	C	T	yes	2023	206	0.101829	1895	182	0.0960422	missense	TP53
LT00022	chr17	7577538	C	T	yes	2016	1640	0.813492	1844	1335	0.72397	missense	TP53
LT00027	chr1	27094338	G	A	yes	3002	2452	0.816789	3534	2295	0.649406	missense	ARID1A
LT00028	chr7	55241678	A	C	yes	1305	676	0.518008	1805	719	0.398338	missense	EGFR
LT00028	chr7	55241707	G	A	yes	1305	678	0.51954	1805	725	0.401662	missense	EGFR
LT00035	chr7	140453136	A	T	yes	1374	151	0.109898	1364	102	0.0747801	missense	BRAF
LT00035	chr17	7574034	C	T	yes	1284	162	0.126168	969	109	0.112487	splice	TP53
LT00039	chr1	27100204	C	T	yes	542	315	0.581181	426	195	0.457746	stop-gained	ARID1A
LT00039	chr17	7577551	C	A	yes	1595	729	0.457053	1315	555	0.422053	missense	TP53
LT00039	chr17	7577552	C	A	yes	1595	732	0.458934	1315	551	0.419011	missense	TP53
LT00041	chr17	7578272	G	A	yes	724	326	0.450276	544	187	0.34375	missense	TP53
LT00008	chr13	48881417	C	T	yes	21	12	0.571429	114	102	0.894737	missense	RB1
LT00008	chr13	49050850	T	C	yes	85	44	0.517647	410	89	0.217073	missense	RB1
LT00009	chr7	55259515	T	G	yes	897	259	0.28874	1085	197	0.181567	missense	EGFR
LT00102	chr1	27023706	TC	T	yes	167	83	0.497006	133	41	0.308271	frameshift	ARID1A
LT00102	chr1	27057684	AC	A	yes	787	274	0.348158	794	291	0.366499	frameshift	ARID1A
LT00102	chr1	27023708	G	A	yes	169	88	0.52071	134	45	0.335821	missense	ARID1A
LT00102	chr2	178098975	A	G	yes	1116	389	0.348566	1213	417	0.343776	missense	NFE2L2
LT00102	chr17	7578212	G	A	yes	1838	1315	0.715452	1751	1144	0.653341	stop-gained	TP53
LT00104	chr19	1207090	T	TA	yes	3844	1208	0.314256	3432	979	0.285256	frameshift	STK11
LT00104	chr17	37880997	G	T	yes	1717	448	0.26092	1441	306	0.212353	missense	ERBB2
LT00107	chr7	55242465	GGAATTAAGAGAAGCA	G	yes	1122	313	0.278966	1253	415	0.331205	nonframeshift	EGFR
LT00108	chr7	55242469	TTAAGAGAAGCAACATCTC	T	yes	1772	985	0.555869	1449	636	0.438923	nonframeshift	EGFR
LT00109	chr17	7577142	C	T	yes	923	274	0.296858	1171	242	0.206661	missense	TP53
LT00092	chr7	55266543	G	T	yes	342	48	0.140351	351	47	0.133903	missense	EGFR
LT00092	chr17	7578211	C	A	yes	1484	475	0.320081	1317	483	0.366743	missense	TP53
LT00110	chr9	139418418	A	G	yes	292	213	0.729452	226	155	0.685841	missense	NOTCH1
LT00113	chr7	55242464	AGGAATTAAGAGAAGC	A	yes	1352	446	0.329882	1266	351	0.277251	nonframeshift	EGFR
LT00113	chr17	7577538	C	T	yes	2335	1225	0.524625	1766	714	0.404304	missense	TP53
LT00121	chr12	46125036	G	C	yes	1044	250	0.239464	1251	260	0.207834	missense	ARID2
LT00121	chr17	7578461	C	A	yes	486	76	0.156379	454	78	0.171806	missense	TP53
LT00122	chr17	7577117	AC	A	yes	1863	753	0.404187	2796	953	0.340844	frameshift	TP53
LT00122	chr2	178098975	A	G	yes	1053	231	0.219373	1146	198	0.172775	missense	NFE2L2
LT00123	chr7	55259515	T	G	yes	2193	664	0.302782	2173	482	0.221813	missense	EGFR
LT00123	chr7	140482927	G	C	yes	111	51	0.459459	130	91	0.7	missense	BRAF
LT00125	chr3	178952074	G	C	yes	2901	301	0.103757	3215	282	0.0877138	missense	PIK3CA
LT00126	chr17	7577121	G	A	yes	1113	602	0.540881	1157	608	0.525497	missense	TP53
LT00127	chr2	178098962	A	G	yes	2586	479	0.185228	2866	743	0.259246	missense	NFE2L2
LT00128	chr7	55242465	GGAATTAAGAGAAGCA	G	yes	2326	1895	0.814703	2208	1888	0.855072	nonframeshift	EGFR
LT00128	chr17	7579494	T	A	yes	1423	638	0.448349	1613	908	0.562926	stop-gained	TP53
LT00094	chr1	27092979	TG	T	yes	1134	372	0.328042	1152	315	0.273438	frameshift	ARID1A
LT00094	chr13	49027168	C	T	yes	641	235	0.366615	789	320	0.405577	stop-gained	RB1
LT00094	chr17	7577124	C	A	yes	711	337	0.47398	921	415	0.450597	missense	TP53
LT00130	chr17	7576928	T	C	yes	2848	1210	0.42486	2207	1006	0.455822	splice	TP53
LT00131	chr7	55259515	T	G	yes	2274	375	0.164908	2405	324	0.134719	missense	EGFR
LT00131	chr17	7577094	G	A	yes	2175	448	0.205977	2741	338	0.123313	missense	TP53
LT00132	chr12	46246206	G	T	yes	1359	706	0.5195	1392	698	0.501437	missense	ARID2
LT00134	chr17	7578468	GC	G	yes	565	253	0.447788	564	197	0.349291	frameshift	TP53
LT00134	chr2	178098960	C	G	yes	1924	452	0.234927	2605	612	0.234933	missense	NFE2L2
LT00136	chr7	55242466	GAA	G	yes	1802	958	0.531632	1509	659	0.436713	frameshift	EGFR
LT00136	chr7	55242470	TAAGAGAAGCA	T	yes	1802	951	0.527747	1509	657	0.435388	frameshift	EGFR
LT00136	chr7	55242481	A	G	yes	2604	986	0.378648	2336	679	0.290668	missense	EGFR
LT00137	chr7	55248998	A	ATGGCCAGCG	yes	660	298	0.451515	524	202	0.385496	nonframeshift	EGFR
LT00137	chr17	7572986	G	A	yes	482	283	0.587137	256	147	0.574219	stop-gained	TP53
LT00138	chr17	7577530	TG	T	yes	2258	876	0.387954	2366	826	0.349112	frameshift	TP53
LT00140	chr17	7577120	C	A	yes	2436	634	0.260263	1814	587	0.323594	missense	TP53
LT00142	chr2	178098816	C	G	yes	2279	202	0.0886354	1760	172	0.0977273	missense	NFE2L2
LT00142	chr17	7577548	C	A	yes	1819	440	0.241891	1673	435	0.260012	missense	TP53
LT00143	chr17	7576887	TTC	T	yes	2279	664	0.291356	2428	638	0.262768	frameshift	TP53
LT00145	chr2	178098810	C	G	yes	2326	906	0.38951	2019	817	0.404656	missense	NFE2L2
LT00145	chr17	7578457	C	G	yes	558	373	0.668459	338	207	0.612426	missense	TP53
LT00098	chr13	48951080	TA	T	yes	418	239	0.57177	501	222	0.443114	frameshift	RB1
LT00098	chr17	7579462	AG	A	yes	1019	821	0.805692	1278	1061	0.830203	frameshift	TP53
LT00098	chr2	212426684	G	T	yes	195	106	0.54359	142	83	0.584507	missense	ERBB4
LT00058	chr12	46246206	G	T	yes	1176	407	0.346088	1243	291	0.234111	missense	ARID2
LT00059	chr7	55259515	T	G	yes	2080	1408	0.676923	1554	1070	0.688546	missense	EGFR
LT00059	chr12	46287441	A	G	yes	1705	204	0.119648	923	119	0.128927	missense	ARID2
LT00045	chr7	55241708	G	C	yes	1768	262	0.14819	1513	140	0.0925314	missense	EGFR
LT00072	chr13	72440538	T	TGCCGCC	yes	272	50	0.183824	366	71	0.193989	nonframeshift	DACH1
LT00073	chr17	7579502	T	TC	yes	906	819	0.903974	981	720	0.733945	frameshift	TP53
LT00073	chr1	27089730	G	T	yes	841	168	0.199762	729	183	0.251029	stop-gained	ARID1A
LT00076	chr7	55259515	T	G	yes	1411	716	0.507442	1436	731	0.509053	missense	EGFR
LT00079	chr19	11132616	CG	C	yes	1560	908	0.582051	1242	757	0.609501	frameshift	SMARCA4
LT00079	chr13	48923160	G	A	yes	148	78	0.527027	134	58	0.432836	splice	RB1
LT00079	chr17	7578442	T	C	yes	287	197	0.686411	376	220	0.585106	missense	TP53
LT00080	chr17	7578461	C	A	yes	490	209	0.426531	568	291	0.512324	missense	TP53
LT00046	chr17	7577058	C	A	yes	2678	1421	0.53062	1952	803	0.411373	stop-gained	TP53
LT00082	chr2	212495189	C	A	yes	306	110	0.359477	364	156	0.428571	stop-gained	ERBB4
LT00082	chr17	7578461	C	A	yes	295	111	0.376271	425	158	0.371765	missense	TP53
LT00086	chr19	1207054	A	T	yes	1583	623	0.393557	1741	641	0.368179	stop-gained	STK11
LT00088	chr13	48881469	T	A	yes	126	122	0.968254	176	60	0.340909	stop-gained	RB1
LT00088	chr13	49050873	T	C	yes	378	332	0.878307	492	226	0.45935	missense	RB1
LT00088	chr17	7578394	T	C	yes	159	123	0.773585	111	99	0.891892	missense	TP53
LT00089	chr2	212530195	T	A	yes	433	42	0.0969977	576	76	0.131944	missense	ERBB4
LT00090	chr7	140549988	T	C	yes	259	142	0.548263	345	68	0.197101	missense	BRAF
LT00090	chr19	11143966	G	T	yes	1185	102	0.0860759	1574	140	0.0889454	missense	SMARCA4
LT00048	chr17	7578535	T	C	yes	173	69	0.398844	106	24	0.226415	missense	TP53
LT00013	chr5	24535245	C	A	yes	217	184	0.847926	184	155	0.842391	missense	CDH10
LT00013	chr5	24535246	A	C	yes	217	185	0.852535	184	156	0.847826	missense	CDH10
LT00013	chr8	35624436	G	A	yes	1461	645	0.441478	1277	610	0.477682	missense	UNC5D
LT00016	chr5	24498608	G	A	yes	632	130	0.205696	660	162	0.245455	missense	CDH10
LT00016	chr7	103155835	C	A	yes	1895	375	0.197889	1522	300	0.197109	missense	RELN
LT00027	chr7	43540381	G	C	yes	848	352	0.415094	674	257	0.381306	missense	HECW1
LT00027	chr19	10610188	G	T	yes	705	293	0.415603	613	139	0.226754	missense	KEAP1
LT00034	chr7	43484537	C	A	yes	552	143	0.259058	402	51	0.126866	missense	HECW1
LT00039	chr13	92345783	G	A	yes	3685	402	0.109091	2132	394	0.184803	missense	GPC5
LT00041	chr8	35608163	C	A	yes	904	144	0.159292	708	197	0.278249	missense	UNC5D
LT00009	chr20	47246123	G	A	yes	2616	244	0.0932722	1822	127	0.0697036	missense	PREX1
LT00059	chr20	47324916	G	A	yes	2365	445	0.188161	1751	544	0.31068	missense	PREX1
LT00073	chr7	103322703	G	T	yes	782	307	0.392583	1110	342	0.308108	missense	RELN
LT00073	chr17	29541529	G	T	yes	222	193	0.869369	256	218	0.851562	stop-gained	NF1
LT00074	chr19	10600420	C	G	yes	1046	407	0.389101	1419	651	0.458774	missense	KEAP1
LT00080	chr9	21974748	C	A	yes	701	290	0.413695	400	134	0.335	stop-gained	CDKN2A
LT00046	chr19	10602878	G	A	yes	2674	1012	0.378459	1986	634	0.319235	missense	KEAP1
LT00082	chr7	103124136	A	G	yes	256	91	0.355469	308	80	0.25974	missense	RELN
LT00082	chr8	35425697	A	T	yes	1030	172	0.16699	1048	158	0.150763	missense	UNC5D
LT00082	chr20	47271847	G	T	yes	965	211	0.218653	833	241	0.289316	stop-gained	PREX1
LT00086	chr19	10602340	C	A	yes	970	467	0.481443	867	399	0.460208	missense	KEAP1
LT00102	chr5	24487906	C	G	yes	910	246	0.27033	955	294	0.307853	missense	CDH10
LT00113	chr8	35616877	C	A	yes	84	10	0.119048	154	14	0.0909091	missense	UNC5D
LT00121	chr19	10602854	C	T	yes	1386	248	0.178932	1516	183	0.120712	missense	KEAP1
LT00125	chr7	103237068	G	T	yes	720	87	0.120833	737	116	0.157395	missense	RELN
LT00127	chr7	103131209	G	C	yes	1044	459	0.439655	886	406	0.458239	missense	RELN
LT00128	chr7	103185675	C	T	yes	452	98	0.216814	360	86	0.238889	missense	RELN
LT00130	chr5	24537762	C	T	yes	314	118	0.375796	425	139	0.327059	missense	CDH10
LT00130	chr7	43447178	T	A	yes	192	76	0.395833	250	54	0.216	missense	HECW1
LT00130	chr7	103234882	C	A	yes	578	185	0.320069	717	302	0.421199	missense	RELN
LT00130	chr9	21974679	G	A	yes	361	210	0.581717	500	297	0.594	stop-gained	CDKN2A
LT00130	chr19	10602619	C	T	yes	717	502	0.700139	894	578	0.646532	missense	KEAP1
LT00132	chr7	103191623	C	T	yes	1008	393	0.389881	1224	562	0.45915	missense	RELN
LT00140	chr9	21971208	C	A	yes	666	225	0.337838	618	185	0.299353	splice	CDKN2A
LT00145	chr9	21971208	C	T	yes	467	274	0.586724	489	299	0.611452	splice	CDKN2A
LT00013	chr9	21974726	GCCTCCAGCAGCGCCCGCA	G	yes	466	241	0.517167	333	146	0.438438	nonframeshift	CDKN2A
LT00080	chr7	103629803	TGCCGCC	T	yes	368	64	0.173913	44	8	0.181818	nonframeshift	RELN
LT00145	chr7	103629730	G	GC	yes	110	40	0.363636	198	81	0.409091	frameshift	RELN
LT00046	chr9	21971096	C	A	yes	911	363	0.398463	1825	656	0.359452	stop-gained	CDKN2A
LT00094	chr10	89692904	C	T	yes	1286	621	0.482893	1059	269	0.254013	stop-gained	PTEN
LT00102	chr7	103207075	C	T	yes	1029	488	0.474247	836	353	0.422249	missense	RELN
LT00092	chr9	21971036	C	A	yes	1901	815	0.428722	1593	650	0.408035	missense	CDKN2A
LT00082	chr12	25398284	C	A	yes	180	96	0.533333	236	137	0.580508	missense	KRAS
LT00138	chr9	21971028	C	T	yes	1229	596	0.484947	1255	548	0.436653	stop-gained	CDKN2A
LT00125	chr12	25398284	C	T	yes	230	54	0.234783	238	40	0.168067	missense	KRAS
LT00098	chr8	35631923	G	T	no	1041	249	0.239193	742	43	0.058	missense	UNC5D
LT00130	chr20	47342839	CG	C	no	780	236	0.302564	529	96	0.1815	frameshift	PREX1
LT00136	chr10	89653782	A	G	no	112	17	0.151786	34	2	0.0588	missense	PTEN
LT00014	chr13	92408631	G	A	no	52	8	0.153846	2	0	0	missense	GPC5
LT00015	chr7	103137192	C	T	no	1249	240	0.192154	804	25	0.0311	missense	RELN
LT00016	chr7	43548567	G	A	no	544	45	0.0827206	466	0	0	splice	HECW1
LT00016	chr7	103251227	G	C	no	994	96	0.0965795	928	0	0	missense	RELN
LT00016	chr7	103341397	T	C	no	395	32	0.0810127	290	3	0.0103	missense	RELN
LT00016	chr10	89690826	C	T	no	391	45	0.11509	425	0	0	missense	PTEN
LT00016	chr17	29527506	A	G	no	22	10	0.454545	0	0	0	missense	NF1
LT00017	chr7	103138686	T	C	no	100	10	0.1	100	0	0	missense	RELN
LT00017	chr7	103138687	C	T	no	100	15	0.15	100	0	0	missense	RELN
LT00017	chr7	103185730	C	T	no	580	63	0.108621	402	1	0.0025	missense	RELN
LT00017	chr13	92797151	G	A	no	36	6	0.166667	64	0	0	missense	GPC5
LT00018	chr8	35616901	T	C	no	166	14	0.0843373	96	0	0	missense	UNC5D
LT00018	chr17	29509663	G	A	no	192	23	0.119792	128	2	0.0156	missense	NF1
LT00019	chr7	103130332	C	T	no	211	18	0.0853081	204	0	0	missense	RELN
LT00020	chr7	43548719	T	C	no	345	30	0.0869565	312	1	0.0032	missense	HECW1
LT00020	chr10	89717712	C	T	no	279	39	0.139785	195	1	0.0051	missense	PTEN
LT00020	chr10	89717733	T	C	no	279	40	0.143369	195	0	0	missense	PTEN
LT00020	chr17	29496935	A	G	no	144	16	0.111111	152	0	0	missense	NF1
LT00022	chr7	103130198	T	C	no	215	20	0.0930233	151	0	0	missense	RELN
LT00024	chr12	25378577	A	G	no	28	6	0.214286	30	0	0	missense	KRAS
LT00027	chr7	43548596	T	G	no	422	47	0.111374	329	1	0.003	missense	HECW1
LT00027	chr7	103194137	A	G	no	43	6	0.139535	38	0	0	missense	RELN
LT00029	chr20	47444273	T	C	no	14	14	1	0	0	0	missense	PREX1
LT00032	chr8	35544131	C	T	no	186	38	0.204301	191	0	0	missense	UNC5D
LT00033	chr7	103130263	G	A	no	77	15	0.194805	152	0	0	missense	RELN
LT00034	chr5	24535364	T	C	no	121	12	0.0991736	192	0	0	missense	CDH10
LT00034	chr17	29541487	A	G	no	202	23	0.113861	306	0	0	missense	NF1
LT00038	chr5	24535259	A	G	no	54	11	0.203704	24	0	0	missense	CDH10
LT00039	chr13	92797131	C	A	no	84	50	0.595238	120	0	0	missense	GPC5
LT00039	chr17	29422389	T	C	no	72	8	0.111111	32	0	0	splice	NF1
LT00008	chr10	89717762	A	G	no	391	46	0.117647	393	3	0.0076	missense	PTEN
LT00008	chr13	92560262	T	C	no	120	12	0.1	322	2	0.0062	missense	GPC5
LT00008	chr17	29548875	T	C	no	127	18	0.141732	215	0	0	missense	NF1
LT00008	chr17	29548887	A	G	no	127	12	0.0944882	215	0	0	missense	NF1
LT00009	chr5	24505331	A	G	no	12	10	0.833333	0	0	0	missense	CDH10
LT00009	chr7	103130261	A	G	no	273	86	0.315018	188	0	0	missense	RELN
LT00009	chr7	103130302	T	C	no	273	23	0.0842491	187	0	0	missense	RELN
LT00009	chr7	103417025	G	A	no	344	46	0.133721	396	0	0	stop-gained	RELN
LT00009	chr10	89717654	T	C	no	509	75	0.147348	718	6	0.0084	missense	PTEN
LT00009	chr13	92345654	A	G	no	1319	138	0.104625	911	1	0.0011	missense	GPC5
LT00009	chr17	29508443	C	T	no	782	65	0.0831202	811	3	0.0037	missense	NF1
LT00009	chr19	10597407	G	A	no	1728	300	0.173611	1567	0	0	missense	KEAP1
LT00009	chr19	10602335	G	T	no	1738	136	0.0782509	1336	2	0.0015	missense	KEAP1
LT00009	chr20	47244144	C	T	no	1192	120	0.100671	995	10	0.0101	missense	PREX1
LT00043	chr5	24535263	T	C	no	336	48	0.142857	149	0	0	missense	CDH10
LT00043	chr7	103185642	T	C	no	704	69	0.0980114	339	2	0.0059	missense	RELN
LT00043	chr10	89725044	G	A	no	845	80	0.0946746	249	0	0	missense	PTEN
LT00043	chr12	25380201	T	C	no	116	18	0.155172	122	0	0	missense	KRAS
LT00052	chr12	25380225	A	G	no	206	26	0.126214	360	16	0.0444	missense	KRAS
LT00052	chr13	92380865	A	G	no	236	34	0.144068	418	2	0.0048	missense	GPC5
LT00052	chr20	47244443	G	T	no	1863	162	0.0869565	951	1	0.0011	missense	PREX1
LT00055	chr7	103130210	T	C	no	351	84	0.239316	272	2	0.0074	missense	RELN
LT00055	chr10	89717618	T	C	no	566	95	0.167845	419	2	0.0048	missense	PTEN
LT00058	chr7	103194174	C	T	no	432	32	0.0740741	206	0	0	missense	RELN
LT00059	chr7	103124260	G	A	no	146	13	0.0890411	1565	6	0.0038	stop-gained	RELN
LT00059	chr7	103130195	A	G	no	400	94	0.235	368	2	0.0054	missense	RELN
LT00059	chr10	89725188	C	T	no	990	144	0.145455	1591	1	0.0006	missense	PTEN
LT00059	chr13	92797143	G	A	no	192	36	0.1875	154	0	0	missense	GPC5
LT00059	chr19	10602356	G	A	no	1906	191	0.10021	1153	0	0	missense	KEAP1
LT00044	chr7	43484297	A	G	no	259	24	0.0926641	1359	9	0.0066	missense	HECW1
LT00044	chr7	103131254	G	A	no	95	10	0.105263	1258	0	0	stop-gained	RELN
LT00044	chr8	35631874	A	G	no	76	10	0.131579	1429	25	0.0175	missense	UNC5D
LT00070	chr7	103151380	A	G	no	98	12	0.122449	44	0	0	missense	RELN
LT00045	chr7	103417009	T	C	no	890	66	0.0741573	446	0	0	missense	RELN
LT00045	chr12	25380310	T	C	no	100	72	0.72	52	0	0	missense	KRAS
LT00045	chr12	25398227	T	C	no	612	117	0.191176	328	2	0.0061	missense	KRAS
LT00045	chr20	47244451	T	C	no	1447	268	0.185211	1136	8	0.007	missense	PREX1
LT00072	chr10	89711965	T	C	no	378	60	0.15873	546	2	0.0037	missense	PTEN
LT00072	chr19	10602316	A	G	no	762	65	0.0853018	968	7	0.0072	missense	KEAP1
LT00072	chr19	10610249	T	C	no	677	61	0.0901034	1172	2	0.0017	missense	KEAP1
LT00072	chr20	47253060	G	A	no	684	59	0.0862573	832	2	0.0024	stop-gained	PREX1
LT00073	chr7	103138522	A	G	no	340	31	0.0911765	179	2	0.0112	splice	RELN
LT00073	chr13	92380891	A	C	no	120	26	0.216667	8	0	0	missense	GPC5
LT00073	chr17	29546107	A	G	no	343	44	0.12828	572	0	0	missense	NF1
LT00073	chr20	47351094	C	T	no	916	114	0.124454	1402	5	0.0036	missense	PREX1
LT00074	chr7	103113308	A	G	no	58	8	0.137931	621	7	0.0113	missense	RELN
LT00075	chr5	24535296	C	T	no	78	12	0.153846	76	0	0	missense	CDH10
LT00075	chr7	43548644	T	C	no	611	77	0.126023	255	2	0.0078	missense	HECW1
LT00075	chr7	103194191	T	C	no	48	10	0.208333	66	0	0	missense	RELN
LT00075	chr7	103234829	A	G	no	854	70	0.0819672	587	19	0.0324	missense	RELN
LT00075	chr10	89692841	G	C	no	767	55	0.071708	630	8	0.0127	missense	PTEN
LT00075	chr10	89711963	T	C	no	118	12	0.101695	184	0	0	missense	PTEN
LT00075	chr10	89717640	T	C	no	105	24	0.228571	207	0	0	missense	PTEN
LT00075	chr13	92345479	A	G	no	348	32	0.091954	382	6	0.0157	missense	GPC5
LT00076	chr7	103151419	G	A	no	183	18	0.0983607	22	0	0	missense	RELN
LT00076	chr10	89711920	T	A	no	257	32	0.124514	304	0	0	missense	PTEN
LT00076	chr10	89712004	G	A	no	257	20	0.077821	305	0	0	missense	PTEN
LT00076	chr17	29496983	T	C	no	240	20	0.0833333	130	0	0	missense	NF1
LT00078	chr13	92560214	A	G	no	189	38	0.201058	404	1	0.0025	missense	GPC5
LT00079	chr12	25380206	T	C	no	187	24	0.128342	86	0	0	missense	KRAS
LT00080	chr7	103151380	A	G	no	104	13	0.125	38	0	0	missense	RELN
LT00046	chr7	103194216	G	A	no	389	32	0.0822622	285	0	0	missense	RELN
LT00046	chr7	103341367	C	T	no	1154	106	0.0918544	597	0	0	missense	RELN
LT00046	chr12	25380303	A	G	no	98	16	0.163265	190	0	0	missense	KRAS
LT00046	chr19	10600335	C	T	no	283	34	0.120141	180	0	0	missense	KEAP1
LT00082	chr7	103151391	A	T	no	60	14	0.233333	30	0	0	missense	RELN
LT00082	chr12	25380288	T	C	no	114	13	0.114035	54	0	0	missense	KRAS
LT00085	chr8	35544126	G	A	no	100	10	0.1	166	2	0.012	missense	UNC5D
LT00085	chr8	35544222	T	C	no	100	10	0.1	166	2	0.012	missense	UNC5D
LT00086	chr12	25398315	T	C	no	106	12	0.113208	142	0	0	missense	KRAS
LT00086	chr13	92797219	A	G	no	24	14	0.583333	159	0	0	missense	GPC5
LT00089	chr7	103138585	A	G	no	282	26	0.0921986	216	0	0	missense	RELN
LT00089	chr8	35616851	A	G	no	78	12	0.153846	160	0	0	missense	UNC5D
LT00090	chr13	92380816	A	G	no	197	30	0.152284	148	0	0	missense	GPC5
LT00090	chr13	92380853	G	A	no	197	18	0.0913706	148	0	0	missense	GPC5
LT00047	chr7	103130345	C	T	no	69	18	0.26087	122	0	0	missense	RELN
LT00047	chr7	103205989	C	T	no	2291	179	0.0781318	1395	2	0.0014	missense	RELN
LT00047	chr13	92560214	A	G	no	312	28	0.0897436	180	0	0	missense	GPC5
LT00047	chr17	29509570	A	G	no	208	22	0.105769	163	0	0	missense	NF1
LT00048	chr8	35544219	G	A	no	718	107	0.149025	209	0	0	missense	UNC5D
LT00048	chr13	92560231	T	C	no	498	40	0.0803213	542	1	0.0018	missense	GPC5
LT00049	chr7	103185672	C	T	no	948	71	0.0748945	668	0	0	missense	RELN
LT00104	chr13	92797158	C	T	no	26	12	0.461538	14	0	0	stop-gained	GPC5
LT00104	chr13	92797168	G	A	no	26	24	0.923077	14	0	0	missense	GPC5
LT00108	chr7	103151419	G	A	no	20	5	0.25	12	0	0	missense	RELN
LT00092	chr17	29496977	T	C	no	356	34	0.0955056	322	6	0.0186	missense	NF1
LT00110	chr7	103151399	A	G	no	98	11	0.112245	26	0	0	missense	RELN
LT00110	chr13	92560304	T	C	no	105	16	0.152381	282	0	0	missense	GPC5
LT00113	chr7	103138576	C	T	no	166	19	0.114458	236	0	0	missense	RELN
LT00113	chr10	89725072	A	G	no	321	26	0.0809969	521	0	0	missense	PTEN
LT00118	chr7	103138648	T	C	no	82	10	0.121951	84	0	0	missense	RELN
LT00118	chr10	89717723	T	C	no	167	16	0.0958084	359	5	0.0139	missense	PTEN
LT00118	chr12	25380310	T	C	no	33	8	0.242424	76	1	0.0132	missense	KRAS
LT00119	chr10	89711975	T	A	no	160	18	0.1125	566	0	0	missense	PTEN
LT00121	chr10	89653841	A	G	no	116	12	0.103448	130	0	0	missense	PTEN
LT00121	chr20	47244424	T	C	no	864	95	0.109954	1163	10	0.0086	missense	PREX1
LT00122	chr10	89711978	T	C	no	237	31	0.130802	447	4	0.0089	missense	PTEN
LT00123	chr7	103194176	T	C	no	73	10	0.136986	148	0	0	missense	RELN
LT00123	chr12	25378690	A	G	no	26	6	0.230769	32	0	0	missense	KRAS
LT00123	chr12	25398216	T	C	no	88	12	0.136364	233	1	0.0043	missense	KRAS
LT00127	chr12	25378690	A	G	no	48	6	0.125	58	0	0	missense	KRAS
LT00127	chr12	25380246	T	C	no	70	8	0.114286	30	0	0	missense	KRAS
LT00127	chr19	10600347	A	G	no	160	14	0.0875	132	0	0	missense	KEAP1
LT00130	chr8	35093381	G	A	no	212	18	0.0849057	215	0	0	missense	UNC5D
LT00130	chr10	89711986	A	G	no	167	14	0.0838323	405	5	0.0123	missense	PTEN
LT00132	chr7	103151365	T	C	no	79	18	0.227848	12	0	0	missense	RELN
LT00134	chr13	92797105	A	G	no	50	10	0.2	264	1	0.0038	missense	GPC5
LT00135	chr7	103130329	C	T	no	238	20	0.0840336	299	0	0	stop-gained	RELN
LT00136	chr10	89711903	A	G	no	56	8	0.142857	403	0	0	missense	PTEN
LT00142	chr10	89711921	A	G	no	108	10	0.0925926	344	2	0.0058	missense	PTEN
LT00143	chr7	103629721	C	G	no	452	46	0.10177	94	0	0	missense	RELN
LT00143	chr13	92380798	T	C	no	198	16	0.0808081	113	0	0	missense	GPC5
LT00016	chr7	103629730	G	GC	no	18	10	0.555556	176	6	0.0341	frameshift	RELN
LT00031	chr8	35616880	GA	G	no	100	28	0.28	148	12	0.0811	frameshift	UNC5D
LT00044	chr7	43477658	GT	G	no	29	8	0.275862	1104	2	0.0018	frameshift	HECW1
LT00046	chr7	103629730	G	GC	no	317	108	0.340694	263	4	0.0152	frameshift	RELN
LT00048	chr7	103629730	G	GC	no	66	58	0.878788	43	7	0.1628	frameshift	RELN
LT00012	chr7	103124260	G	A	no	637	67	0.105181	1588	10	0.0063	stop-gained	RELN
LT00012	chr7	103275984	A	G	no	30	6	0.2	0	0	0	missense	RELN
LT00012	chr12	25380316	C	T	no	48	14	0.291667	52	0	0	missense	KRAS
LT00013	chr7	103124260	G	A	no	890	98	0.110112	1508	12	0.008	stop-gained	RELN
LT00014	chr7	103124260	G	A	no	851	76	0.0893067	1206	8	0.0066	stop-gained	RELN
LT00015	chr8	35616847	T	C	no	202	18	0.0891089	267	2	0.0075	missense	UNC5D
LT00016	chr7	43447311	A	G	no	359	28	0.0779944	513	2	0.0039	missense	HECW1
LT00016	chr7	103130200	T	C	no	286	28	0.0979021	197	0	0	missense	RELN
LT00016	chr8	35093373	G	A	no	286	27	0.0944056	184	0	0	missense	UNC5D
LT00016	chr10	89717645	A	G	no	271	28	0.103321	346	5	0.0145	missense	PTEN
LT00016	chr12	25398230	T	C	no	250	26	0.104	185	0	0	missense	KRAS
LT00016	chr20	47244488	C	T	no	814	77	0.0945946	1039	3	0.0029	missense	PREX1
LT00017	chr12	25398308	T	C	no	186	22	0.11828	270	0	0	missense	KRAS
LT00018	chr8	35616845	T	C	no	96	10	0.104167	166	1	0.006	missense	UNC5D
LT00020	chr7	103275881	T	C	no	16	6	0.375	0	0	0	missense	RELN
LT00020	chr7	103281047	C	T	no	317	24	0.0757098	386	0	0	missense	RELN
LT00020	chr8	35544170	T	C	no	168	24	0.142857	180	1	0.0056	missense	UNC5D
LT00020	chr17	29541551	T	C	no	156	24	0.153846	185	6	0.0324	missense	NF1
LT00021	chr7	103151449	T	C	no	42	8	0.190476	18	0	0	missense	RELN
LT00021	chr13	92797093	G	A	no	102	26	0.254902	66	0	0	missense	GPC5
LT00022	chr7	103124260	G	A	no	967	102	0.105481	1106	5	0.0045	stop-gained	RELN
LT00022	chr8	35093339	G	A	no	34	6	0.176471	27	0	0	missense	UNC5D
LT00022	chr13	92380919	A	G	no	130	13	0.1	126	2	0.0159	missense	GPC5
LT00024	chr7	103124260	G	A	no	691	63	0.0911722	1567	2	0.0013	stop-gained	RELN
LT00027	chr7	103124260	G	A	no	888	77	0.0867117	1591	0	0	stop-gained	RELN
LT00027	chr20	47444273	T	C	no	6	6	1	0	0	0	missense	PREX1
LT00028	chr7	103124260	G	A	no	814	98	0.120393	1314	3	0.0023	stop-gained	RELN
LT00028	chr7	103138630	T	C	no	104	12	0.115385	81	0	0	missense	RELN
LT00028	chr12	25378682	A	C	no	44	6	0.136364	12	0	0	missense	KRAS
LT00029	chr7	103124260	G	A	no	509	48	0.0943026	1026	6	0.0058	stop-gained	RELN
LT00030	chr7	103138613	A	G	no	86	12	0.139535	46	0	0	stop-gained	RELN
LT00031	chr7	103124260	G	A	no	764	75	0.0981675	1107	12	0.0108	stop-gained	RELN
LT00031	chr13	92797123	T	C	no	110	12	0.109091	116	2	0.0172	missense	GPC5
LT00032	chr7	103341439	G	A	no	425	40	0.0941176	416	0	0	missense	RELN
LT00032	chr13	92408608	T	C	no	48	6	0.125	174	0	0	missense	GPC5
LT00033	chr7	103130252	G	A	no	152	21	0.138158	77	1	0.013	missense	RELN
LT00034	chr13	92560237	A	G	no	134	18	0.134328	153	0	0	missense	GPC5
LT00035	chr7	103124260	G	A	no	977	74	0.0757421	1177	3	0.0025	stop-gained	RELN
LT00036	chr13	92380804	C	T	no	74	18	0.243243	56	0	0	missense	GPC5
LT00038	chr10	89717699	G	A	no	106	10	0.0943396	21	0	0	missense	PTEN
LT00038	chr17	29509589	C	T	no	122	16	0.131148	45	0	0	missense	NF1
LT00039	chr5	24535342	C	A	no	388	33	0.0850515	353	6	0.017	missense	CDH10
LT00039	chr13	92380817	C	T	no	349	52	0.148997	331	0	0	missense	GPC5
LT00008	chr7	43548663	A	G	no	547	57	0.104205	676	2	0.003	missense	HECW1
LT00009	chr7	43484837	G	A	no	842	68	0.0807601	1309	6	0.0046	missense	HECW1
LT00009	chr7	43485158	A	G	no	939	91	0.0969116	1	0	0	missense	HECW1
LT00009	chr7	103138587	A	G	no	474	38	0.0801688	0	0	0	missense	RELN
LT00009	chr8	35544200	A	G	no	472	82	0.173729	56	0	0	missense	UNC5D
LT00009	chr8	35544203	T	C	no	472	67	0.141949	56	0	0	missense	UNC5D
LT00009	chr10	89711990	T	C	no	736	64	0.0869565	515	0	0	missense	PTEN
LT00009	chr12	25380257	C	T	no	178	16	0.0898876	362	2	0.0055	missense	KRAS
LT00009	chr12	25380321	A	G	no	178	16	0.0898876	362	0	0	missense	KRAS
LT00009	chr17	29528480	T	C	no	1014	93	0.091716	1066	5	0.0047	missense	NF1
LT00009	chr20	47253069	A	G	no	897	76	0.0847269	1692	6	0.0035	missense	PREX1
LT00043	chr7	43548624	T	C	no	373	37	0.0991957	1181	2	0.0017	missense	HECW1
LT00043	chr7	103132457	T	C	no	782	71	0.0907928	9	0	0	missense	RELN
LT00043	chr7	103629763	G	A	no	26	6	0.230769	12	0	0	missense	RELN
LT00043	chr12	25378586	C	T	no	98	10	0.102041	0	0	0	missense	KRAS
LT00052	chr8	35093393	G	A	no	372	27	0.0725806	32	0	0	missense	UNC5D
LT00052	chr12	25380166	A	G	no	360	28	0.0777778	206	0	0	splice	KRAS
LT00055	chr7	43548672	C	T	no	665	84	0.126316	1187	1	0.0008	missense	HECW1
LT00055	chr8	35616836	A	G	no	261	34	0.130268	0	0	0	splice	UNC5D
LT00058	chr12	25380213	A	G	no	189	53	0.280423	88	0	0	missense	KRAS
LT00058	chr12	25380268	A	G	no	189	52	0.275132	88	0	0	missense	KRAS
LT00059	chr7	43531681	A	T	no	877	210	0.239453	1494	0	0	missense	HECW1
LT00059	chr7	103151401	T	C	no	142	16	0.112676	0	0	0	missense	RELN
LT00059	chr8	35647920	A	G	no	787	62	0.0787802	0	0	0	missense	UNC5D
LT00059	chr17	29541482	A	G	no	695	86	0.123741	963	3	0.0031	missense	NF1
LT00044	chr7	103138638	T	C	no	340	33	0.0970588	0	0	0	missense	RELN
LT00044	chr10	89711995	A	G	no	278	78	0.280576	1	0	0	missense	PTEN
LT00044	chr12	25378558	T	C	no	78	13	0.166667	0	0	0	missense	KRAS
LT00070	chr5	24535268	T	C	no	315	38	0.120635	276	2	0.0072	missense	CDH10
LT00045	chr7	43548699	T	C	no	563	104	0.184725	887	0	0	missense	HECW1
LT00045	chr7	103136330	T	C	no	1009	98	0.0971259	0	0	0	missense	RELN
LT00045	chr17	29527615	T	A	no	18	6	0.333333	0	0	0	splice	NF1
LT00045	chr20	47361684	C	T	no	1101	80	0.0726612	2235	9	0.004	missense	PREX1
LT00072	chr7	103138536	A	G	no	114	18	0.157895	342	2	0.0058	missense	RELN
LT00072	chr7	103629656	C	T	no	666	52	0.0780781	527	4	0.0076	missense	RELN
LT00072	chr13	92380920	G	A	no	208	23	0.110577	47	1	0.0213	splice	GPC5
LT00072	chr20	47244436	T	C	no	1119	97	0.0866845	600	2	0.0033	missense	PREX1
LT00072	chr20	47253087	G	A	no	831	69	0.0830325	684	9	0.0132	missense	PREX1
LT00073	chr5	24535383	T	C	no	238	32	0.134454	166	0	0	missense	CDH10
LT00073	chr12	25398236	A	G	no	158	14	0.0886076	112	0	0	missense	KRAS
LT00073	chr17	29508473	T	C	no	391	32	0.0818414	244	2	0.0082	missense	NF1
LT00075	chr13	92380867	G	A	no	55	10	0.181818	28	0	0	missense	GPC5
LT00076	chr8	35093349	G	A	no	234	23	0.0982906	433	0	0	missense	UNC5D
LT00076	chr10	89711980	T	C	no	305	39	0.127869	257	0	0	missense	PTEN
LT00076	chr13	92380826	A	G	no	150	28	0.186667	211	0	0	missense	GPC5
LT00076	chr13	92380912	A	G	no	150	20	0.133333	211	0	0	missense	GPC5
LT00078	chr5	24535250	A	G	no	186	19	0.102151	128	0	0	missense	CDH10
LT00046	chr7	103341381	T	C	no	597	58	0.0971524	1154	3	0.0026	missense	RELN
LT00046	chr8	35588552	C	A	no	1253	955	0.762171	2	0	0	missense	UNC5D
LT00046	chr12	25380256	T	C	no	190	56	0.294737	98	0	0	missense	KRAS
LT00046	chr17	29509535	A	T	no	580	62	0.106897	966	2	0.0021	missense	NF1
LT00082	chr7	103629721	C	T	no	118	11	0.0932203	298	0	0	missense	RELN
LT00085	chr13	92560271	T	C	no	332	32	0.0963855	114	0	0	missense	GPC5
LT00085	chr17	29527542	A	G	no	14	14	1	6	0	0	missense	NF1
LT00086	chr12	25380168	C	T	no	76	8	0.105263	74	0	0	missense	KRAS
LT00086	chr13	92797084	T	A	no	157	43	0.273885	24	0	0	stop-gained	GPC5
LT00088	chr7	103151446	T	C	no	56	13	0.232143	48	0	0	missense	RELN
LT00089	chr7	103276023	A	G	no	38	6	0.157895	8	0	0	missense	RELN
LT00090	chr5	24535370	A	G	no	127	14	0.110236	191	2	0.0105	missense	CDH10
LT00090	chr7	103151413	T	C	no	56	8	0.142857	38	0	0	missense	RELN
LT00090	chr13	92797132	T	C	no	79	14	0.177215	82	0	0	missense	GPC5
LT00090	chr13	92797204	G	A	no	79	12	0.151899	82	0	0	missense	GPC5
LT00047	chr7	43531756	A	G	no	248	26	0.104839	363	4	0.011	missense	HECW1
LT00047	chr7	103130305	T	C	no	122	68	0.557377	72	1	0.0139	missense	RELN
LT00047	chr17	29533297	T	C	no	587	100	0.170358	1254	0	0	missense	NF1
LT00048	chr7	103138695	A	G	no	510	56	0.109804	0	0	0	missense	RELN
LT00048	chr12	25380340	A	G	no	96	10	0.104167	47	0	0	missense	KRAS
LT00049	chr5	24535272	C	T	no	371	34	0.0916442	652	0	0	missense	CDH10
LT00049	chr8	35616890	A	G	no	431	37	0.0858469	0	0	0	missense	UNC5D
LT00049	chr8	35616967	A	G	no	431	38	0.0881671	0	0	0	missense	UNC5D
LT00049	chr10	89711980	T	C	no	427	45	0.105386	659	3	0.0046	missense	PTEN
LT00049	chr13	92380870	A	G	no	257	42	0.163424	435	1	0.0023	missense	GPC5
LT00049	chr13	92560280	A	G	no	324	34	0.104938	563	0	0	missense	GPC5
LT00104	chr10	89711998	T	C	no	685	55	0.080292	514	8	0.0156	missense	PTEN
LT00107	chr13	92797149	A	G	no	96	12	0.125	174	0	0	missense	GPC5
LT00108	chr7	103138525	T	C	no	135	20	0.148148	124	1	0.0081	missense	RELN
LT00108	chr7	103138638	T	C	no	135	21	0.155556	122	0	0	missense	RELN
LT00108	chr8	35544137	T	C	no	116	17	0.146552	76	0	0	missense	UNC5D
LT00108	chr12	25378642	T	C	no	33	6	0.181818	14	0	0	missense	KRAS
LT00109	chr7	103138545	T	C	no	123	23	0.186992	147	0	0	missense	RELN
LT00109	chr7	103629718	T	C	no	193	16	0.0829016	193	1	0.0052	missense	RELN
LT00092	chr12	25380298	C	T	no	76	10	0.131579	78	0	0	missense	KRAS
LT00110	chr13	92380796	T	C	no	124	21	0.169355	44	0	0	missense	GPC5
LT00117	chr7	103130336	A	G	no	374	42	0.112299	198	2	0.0101	missense	RELN
LT00117	chr7	103151450	T	A	no	44	8	0.181818	74	1	0.0135	missense	RELN
LT00117	chr13	92560189	A	G	no	363	32	0.0881543	213	1	0.0047	splice	GPC5
LT00119	chr12	25380208	T	A	no	52	18	0.346154	46	0	0	missense	KRAS
LT00121	chr7	103138680	A	G	no	151	15	0.0993377	119	0	0	missense	RELN
LT00121	chr17	29541496	A	C	no	295	24	0.0813559	324	1	0.0031	missense	NF1
LT00123	chr7	103194108	G	A	no	148	16	0.108108	73	0	0	missense	RELN
LT00125	chr7	103138666	T	C	no	219	44	0.200913	248	0	0	missense	RELN
LT00125	chr7	103389934	T	A	no	715	100	0.13986	651	36	0.0553	missense	RELN
LT00125	chr13	92560304	T	C	no	386	38	0.0984456	324	2	0.0062	missense	GPC5
LT00126	chr7	103557630	T	C	no	12	8	0.666667	2	0	0	missense	RELN
LT00128	chr7	103180732	G	A	no	703	56	0.0796586	641	17	0.0265	missense	RELN
LT00128	chr13	92560214	A	G	no	215	24	0.111628	169	2	0.0118	missense	GPC5
LT00128	chr20	47249148	T	C	no	115	13	0.113043	263	0	0	missense	PREX1
LT00094	chr7	103341412	T	C	no	314	25	0.0796178	252	0	0	missense	RELN
LT00094	chr13	92380859	A	G	no	144	18	0.125	61	0	0	missense	GPC5
LT00094	chr13	92797191	T	C	no	40	12	0.3	42	0	0	missense	GPC5
LT00131	chr13	92797170	G	A	no	164	14	0.0853659	58	0	0	missense	GPC5
LT00134	chr9	21974811	C	T	no	112	12	0.107143	363	3	0.0083	missense	CDKN2A
LT00134	chr17	29527525	T	C	no	46	6	0.130435	2	0	0	missense	NF1
LT00134	chr17	29527569	T	G	no	46	6	0.130435	2	0	0	missense	NF1
LT00135	chr17	29527569	T	G	no	32	6	0.1875	6	0	0	missense	NF1
LT00136	chr13	92345693	G	T	no	121	28	0.231405	30	0	0	missense	GPC5
LT00137	chr7	103124260	G	A	no	579	49	0.0846287	556	20	0.036	stop-gained	RELN
LT00138	chr7	103124260	G	A	no	731	98	0.134063	554	6	0.0108	stop-gained	RELN
LT00140	chr7	103124260	G	A	no	754	83	0.11008	1433	13	0.0091	stop-gained	RELN
LT00142	chr7	103124260	G	A	no	589	55	0.0933786	254	3	0.0118	stop-gained	RELN
LT00142	chr7	103138613	A	T	no	164	14	0.0853659	30	0	0	stop-gained	RELN
LT00143	chr7	103275975	G	T	no	16	12	0.75	92	1	0.0109	missense	RELN
LT00079	chr7	103629730	G	GC	no	216	83	0.384259	260	10	0.0385	frameshift	RELN
LT00088	chr7	103629730	G	GC	no	120	42	0.35	246	8	0.0325	frameshift	RELN
LT00089	chr7	103629730	G	GC	no	165	50	0.30303	123	4	0.0325	frameshift	RELN
LT00090	chr7	103629730	G	GC	no	94	27	0.287234	285	2	0.007	frameshift	RELN
LT00102	chr7	103629730	G	GC	no	53	26	0.490566	259	41	0.1583	frameshift	RELN
LT00110	chr7	103557606	CA	C	no	16	10	0.625	0	0	0	frameshift	RELN
LT00143	chr7	103629730	G	GC	no	94	34	0.361702	454	10	0.022	frameshift	RELN
LT00040	chr7	103275968	T	C	no	20	14	0.7	74	2	0.027	missense	RELN
LT00040	chr17	29527450	T	C	no	24	6	0.25	2	0	0	missense	NF1
LT00040	chr17	29527464	A	G	no	24	8	0.333333	2	0	0	missense	NF1
LT00012	chr7	103629727	G	A	no	383	62	0.16188	182	0	0	missense	RELN
LT00027	chr20	47271866	C	T	no	206	107	0.519417	40	0	0	missense	PREX1
LT00031	chr12	25380276	T	A	no	95	18	0.189474	16	0	0	missense	KRAS
LT00070	chr7	103474041	G	C	no	1252	159	0.126997	638	0	0	missense	RELN
LT00075	chr7	103130309	T	C	no	164	35	0.213415	68	0	0	missense	RELN
LT00079	chr8	35579778	G	A	no	2250	262	0.116444	2234	0	0	missense	UNC5D
LT00098	chr8	35579778	G	A	no	2060	206	0.1	2330	0	0	missense	UNC5D
LT00113	chr8	35579778	G	A	no	2458	187	0.0760781	1920	0	0	missense	UNC5D
